# Supplementary material for: Socioeconomic differences in recruitment and sickness absence in a large NHS health organisation: a cross-sectional study
Source: PubMed Central journal article supplement — BMJ Open. 2022 Apr 29;12(4):e049880. doi: 10.1136/bmjopen-2021-049880 (PMC9058785; doi:10.1136/bmjopen-2021-049880), 2022-04-29
Supplement: bmjopen-2021-049880.draft_revisions.pdf [file bmjopen-2021-049880.draft_revisions.pdf]

# BMJ Open

BMJ Open is committed to open peer review. As part of this commitment we make the peer review history of every article we publish publicly available.

When an article is published we post the peer reviewers' comments and the authors' responses online. We also post the versions of the paper that were used during peer review. These are the versions that the peer review comments apply to.

The versions of the paper that follow are the versions that were submitted during the peer review process. They are not the versions of record or the final published versions. They should not be cited or distributed as the published version of this manuscript.

BMJ Open is an open access journal and the full, final, typeset and author-corrected version of record of the manuscript is available on our site with no access controls, subscription charges or pay-per-view fees (<http://bmjopen.bmj.com>).

If you have any questions on BMJ Open's open peer review process please email [info.bmjopen@bmj.com](mailto:info.bmjopen@bmj.com)

# BMJ Open

## Patterns of employment and inequalities in sickness absence in a large community and mental health organisation – an observational study.

|                               |                                                                                                                                                                                                                                                                                                                                                                                                                             |
|-------------------------------|-----------------------------------------------------------------------------------------------------------------------------------------------------------------------------------------------------------------------------------------------------------------------------------------------------------------------------------------------------------------------------------------------------------------------------|
| Journal:                      | <i>BMJ Open</i>                                                                                                                                                                                                                                                                                                                                                                                                             |
| Manuscript ID                 | bmjopen-2021-049880                                                                                                                                                                                                                                                                                                                                                                                                         |
| Article Type:                 | Original research                                                                                                                                                                                                                                                                                                                                                                                                           |
| Date Submitted by the Author: | 08-Feb-2021                                                                                                                                                                                                                                                                                                                                                                                                                 |
| Complete List of Authors:     | Daras, Konstantinos ; University of Liverpool, Department of Public Health, Policy and Systems<br>Baker, Wesam; Mersey Care NHS Foundation Trust<br>Oates, Amanda; Mersey Care NHS Foundation Trust<br>Edwards, Louise; Mersey Care NHS Foundation Trust<br>Rafferty, Joe; Mersey Care NHS Foundation Trust<br>Wyatt, Steven; NHS Midlands and Lancashire Commissioning Support Unit<br>Barr, Ben ; University of Liverpool |
| Keywords:                     | Health policy < HEALTH SERVICES ADMINISTRATION & MANAGEMENT, Organisation of health services < HEALTH SERVICES ADMINISTRATION & MANAGEMENT, PUBLIC HEALTH                                                                                                                                                                                                                                                                   |
|                               |                                                                                                                                                                                                                                                                                                                                                                                                                             |

SCHOLARONE™  
Manuscripts

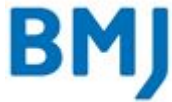

I, the Submitting Author has the right to grant and does grant on behalf of all authors of the Work (as defined in the below author licence), an exclusive licence and/or a non-exclusive licence for contributions from authors who are: i) UK Crown employees; ii) where BMJ has agreed a CC-BY licence shall apply, and/or iii) in accordance with the terms applicable for US Federal Government officers or employees acting as part of their official duties; on a worldwide, perpetual, irrevocable, royalty-free basis to BMJ Publishing Group Ltd ("BMJ") its licensees and where the relevant Journal is co-owned by BMJ to the co-owners of the Journal, to publish the Work in this journal and any other BMJ products and to exploit all rights, as set out in our [licence](#).

The Submitting Author accepts and understands that any supply made under these terms is made by BMJ to the Submitting Author unless you are acting as an employee on behalf of your employer or a postgraduate student of an affiliated institution which is paying any applicable article publishing charge ("APC") for Open Access articles. Where the Submitting Author wishes to make the Work available on an Open Access basis (and intends to pay the relevant APC), the terms of reuse of such Open Access shall be governed by a Creative Commons licence – details of these licences and which [Creative Commons](#) licence will apply to this Work are set out in our licence referred to above.

Other than as permitted in any relevant BMJ Author's Self Archiving Policies, I confirm this Work has not been accepted for publication elsewhere, is not being considered for publication elsewhere and does not duplicate material already published. I confirm all authors consent to publication of this Work and authorise the granting of this licence.

## Patterns of employment and inequalities in sickness absence in a large community and mental health organisation – an observational study.

Dr Konstantinos Daras<sup>1\*</sup>, Wesam Baker<sup>2</sup>, Steven Wyatt<sup>3</sup>, Amanda Oates<sup>2</sup>, Dr Louise Edwards<sup>2</sup>, Dr Joe Rafferty<sup>2</sup>, Professor Ben Barr<sup>1</sup>

<sup>1</sup>Department of Public Health, Policy and Systems, University of Liverpool, Liverpool, L69 3GL

<sup>2</sup>Mersey Care NHS Foundation Trust, Kings Business Park, Trust Offices/V7 Buildings, Prescot L34 1PJ

<sup>3</sup>The Strategy Unit, NHS Midlands and Lancashire Commissioning Support Unit, Kingston House, 438-450 High St, West Midlands B70 9LD

\*Correspondence to Konstantinos Daras, Department of Public Health, Policy and Systems, University of Liverpool, The Farr Institute@HeRC, Waterhouse Building, 2nd Floor Block F, Liverpool L69 3GL, UK; [konstantinos.daras@liverpool.ac.uk](mailto:konstantinos.daras@liverpool.ac.uk)

**Keywords:** public health policy, health inequalities, workplace health, sickness absence

**Word count:** 2,202

### Abstract

#### Objectives:

One way the NHS can help address health inequalities is through its role in the local economy, for example by increasing recruitment from more disadvantaged communities. We do not know, however, the extent to which NHS organisations already recruit from more disadvantaged communities or how poor health varies by socioeconomic position within the NHS workforce.

#### Methods:

We mapped the share of the working age population that was employed at the NHS organisation in the financial year 2018-19, by area deprivation. We then used negative binomial regression models to investigate the extent to which wage level, occupational group and area deprivation were associated with sickness absence amongst employees.

#### Results:

In the most deprived areas, an additional 82 people per 100,000 working age population were employed at this NHS organisation compared to the most affluent areas. Overall, 61% of employees were absent within the year for a median of 3 days. Employees from the most deprived quintile had 1.41 times the higher sickness rates than the employees from the least deprived quintile, when adjusting for age and sex. These differences were largely explained by differences in wage levels with the lowest wage employees having 2.5 times the sickness absence rate as the highest wage group.

#### Conclusion:

This large NHS organisation employed people disproportionately from deprived areas. They were considerably more likely to experience sickness absence. Workplace health policies need to target these workers, adapting to their needs whilst enabling improvements in their working conditions, pay and career progression.

### Strengths and limitations of this study

- One of the strengths of this study is that the use of routine electronic data provided by the Mersey Care ESR overcomes some issues with non-response bias occurring in survey-based research on sickness absence.
- The focus on one large community and mental health NHS organisation provides a useful case study, highlighting the potential for the NHS to improve health in deprived areas through improving the health of its workforce.
- As with all routine data sources a limitation is the quality of coding in the data. For example, employee's ethnicity was not consistently coded in the data and therefore we were not able to investigate the extent to which sickness absence rates vary across the different ethnic groups.
- Employment sickness absent rates by level of deprivation would probably be very different in acute hospital-based NHS organisations, and we cannot say how the pattern we observe in Mersey care differs from other similar NHS organisations.

### Introduction

Employment and working conditions are one of the most important determinants of health and health inequalities. Evidence shows that people in long-term unemployment have a lower life expectancy than those in work[1] and that poor working conditions are detrimental to health[2]. Sickness absence has been linked to working conditions and improvement in psychosocial working conditions can reduce the risk of illness among the employees.[3] Vahtera et al[4] has shown that workers in jobs with poor participation in decision making, poor skill discretion, high job demands and low job control had more than double the risk for a sick leave than workers in jobs without these adverse conditions.

The National Health Service (NHS) is one of the largest employers in the world, and is the biggest in Europe, with over 1.3 million staff (3.5% of the working age population). The employment practices of the NHS can therefore have a major impact on health inequalities. The role of the NHS not just as a provider of health services but also as a major influence on local economies has become increasingly recognised, with the NHS long term plan[5] recognising the role of the NHS as an "Anchor Institution" [6] - that can positively influence the social, economic and environmental factors that help create good health. One way the NHS can do this is by increasing recruitment from more disadvantaged communities and improving the working conditions of staff from these communities. Recent analysis has shown that the NHS makes up a greater share of employment in more deprived regions such as the North West than other parts of the country, and in those regions NHS salaries are generally higher than average for those regions.[7] To effectively address health inequalities, NHS organisations need to not only increase employment from disadvantaged communities but also to have policies and practice in place to promote health amongst these employees. Policies to improve workplace health can increase

1  
2  
3 inequalities if they are most effective amongst more advantaged groups[8]. The NHS has however not  
4 always had the best record on promoting the health of its employees, with sickness absence costing the  
5 NHS an estimated £1.1 billion according to NHS digital report in 2017[9]– higher than in the general  
6 workforce. Previous studies of NHS sickness absence have shown sickness absence in NHS  
7 organisations is concentrated in particular occupational groups[10] and the main causes were  
8 respiratory disorders, digestive disorders and musculoskeletal disorders.[11,12] Whilst some studies  
9 have shown higher sickness absence rates amongst junior grade civil servants[10] compared to senior  
10 grades, there has been limited analysis of inequalities in sickness absence within the NHS. There is also  
11 little evidence assessing the socioeconomic profile of employees of NHS organisations in relation to  
12 the communities in which they are based.  
13  
14  
15  
16  
17  
18  
19

20 To understand the potential for NHS organisations to address health inequalities through their  
21 employment and workplace health policies, we investigate the distribution of the workforce by  
22 socioeconomic deprivation and how sickness absence rates vary based on wage level, occupational  
23 group and level of deprivation using workforce data from a large community and mental Health NHS  
24 organisation based in the North West of England.  
25  
26  
27  
28  
29

## 30 **Methods**

### 31 *Setting and population*

32 Mersey Care NHS Foundation Trust is one largest NHS Providers of mental health, learning disabilities,  
33 addictions and community physical health care in England, providing community health service to areas  
34 of high socioeconomic deprivation in the North West of England .[13]  
35  
36  
37  
38

### 39 *Data and measures*

40 Anonymised staff data was extracted from Mersey Care Electronic Staff Record (ESR) for the financial  
41 year 2008-19. The sample included 7,274 substantive staff, where a member of staff held two roles  
42 the higher salary role was used in this analysis. It also includes demographic information in relation to  
43 age group (18-30, 31-40, 41-50, 51-60, 61-70 and 71-80), gender (male, female), as well as the wage  
44 band (9 pay band classes based on the NHS pay scales[14] (band 1 – lowest pay rate and band 9 –  
45 highest pay rate), and occupational group (5 classes). To avoid small number effects introduced in our  
46 analysis, we combined pay bands 1 and 2 along with pay bands 8 and 9. Each NHS staff member is  
47 assigned to one of the 5 occupational groups in the Mersey Care ESR: a) Scientific, Technical and  
48 Allied Health Professionals, b) Additional Clinical Services (Health Care Assistants), c) Estates and  
49 Ancillary, d) Nursing and Midwifery Registered, and e) Administrative and Clerical group. As Mersey  
50 care is a primarily a community health provider it has relatively few medical staff. To ensure that no  
51 individuals could be identified from the data, all medical (junior to consultant grade) staff, Executive  
52 Directors and Board members have been excluded, leaving 7,005 staff members for analysis. Postcode  
53  
54  
55  
56  
57  
58  
59  
60

1  
2  
3 data was mapped to Lower Super Output Area (LSOA) which are small geographical zones (mean  
4 population 1,500) routinely in England for statistical analysis. Each LSOAs was then linked to a small  
5 area based measure of deprivation – the indices of multiple deprivation (IMD)[15] The IMD is a  
6 composite indicator of the level of deprivation for small geographical areas (LSOAs) across England,  
7 based on seven domains: Income, Employment, Education, Skills and Training, Health, Crime,  
8 Housing and the Environment. Quintiles are calculated by ranking the LSOAs in England from most  
9 deprived (quintile 1) to least deprived (quintile 5) and dividing them into 5 equal groups. For 179 people  
10 their postcode could not be mapped to LSOA, and they were therefore excluded from the analysis giving  
11 6,826 included in the analysis.  
12  
13  
14  
15  
16  
17  
18

### 19 *Statistical Analysis*

20 First, we investigated the geographical distribution of Mersey care staff and how this related to the level  
21 of socioeconomic deprivation. We defined the area from which Mersey Care workers could potentially  
22 come as all local authority areas in which at least 5 Mersey care employees were resident – this gave  
23 28 local authority areas from across the North West with a total working age population of 3,825,255.  
24 We mapped the share the working age population that worked for Mersey Care (per 1,000) for each  
25 LSOA in this area and plotted the share for each deprivation quintile (per 100,000).  
26  
27  
28  
29  
30

31 We then estimated the number of sick days per employee and the % of staff with any sickness absence  
32 in the year for each deprivation quintile. To investigate the multi-variable associations between days  
33 of sickness absence and wage level, occupational group, level of deprivation and demographics we used  
34 a negative binomial regression model to account for overdispersion of the data. Firstly, modelled the  
35 extent to which the days of sickness absence of staff members was associated with deprivation quintiles  
36 whilst controlling for age and sex, then in a second model we additionally included the wage band and  
37 the occupational group to explore the extent to which these explained the any association with  
38 deprivation. All analysis was carried out in R version 3.6.3.  
39  
40  
41  
42  
43  
44  
45

### 46 *Patient and public involvement*

47 No patients were involved in setting the research question or the outcome measures, nor were they  
48 involved in the design or implementation of the study.  
49  
50  
51

## 52 **Results**

53 Figure 1a shows the geographical distribution of the Mersey Care workforce as a share of the working  
54 age population. Employees are spread across the North West although concentrated in the relatively  
55 deprived areas of Merseyside area as well as in the more affluent areas of the Ribble Valley (see  
56 figure 1b, for a map of deprivation in the same area).  
57  
58  
59  
60

Overall, the share of the working age population from the most deprived areas that worked at Mersey Care was very high 197 per 100,000 working age population (figure 2a). This represented 38% of the total Mersey care workforce coming from these deprived area areas as compared to 35% of the total working age population. The highest share of the working age population employed at Mersey care was from areas of intermediate deprivation (quintile 3). Figure 2b and 2c shows that there was a clear gradient across deprivation quintiles in levels of sickness absence. This was true in terms of the proportion of staff that had any sickness absence as well as the median number of sick days.

The negative binomial regression analysis for both models is shown in Table 1. Results from the model 1 showed that the sickness absence rate for the most deprived quintile was 1.41 times higher than in the for the least deprived quintile (reference group) (95% CI 1.16 to 1.70), when just adjusting for age and sex.

After controlling for wage band and occupational group the relationship with deprivation was reduced with the most deprived quintile exhibiting only slightly higher risk of sickness absence, that is no longer statistically significant at the 5% level. This is explained by the higher sickness rate in the lower wage bands. Employees at bands 1-2 (Salaries of ~ £18,000 to £19,000 per annum) and 3 (£19,000-£21,000) had 2.53 and 2.25 times the sickness absence rate than high wage band employees (bands 8-9 : 45,500 to £104,000). The correlation between low wages and area deprivation was high with 47% of the workforce from the most deprived areas being on wage bands 1-3, compared to 7% of those living in less deprived areas. Adjusted sickness absence rates for the staff in Additional Clinical services group (largely care assistants) and the Nursing and Midwifery Registered group were 1.72 and 1.84 time higher than the Administrative and Clerical group.

**Table 1: Results from two negative binomial regression models: Model 1 includes only demographic variables and Model 2 includes additional wage bands and Staff group variables.**

|                                    | n (%)      | Model 1 (without Wage Bands & Staff Groups) |                    |      | Model 2 (with Wage Bands & Staff Groups) |                    |      |
|------------------------------------|------------|---------------------------------------------|--------------------|------|------------------------------------------|--------------------|------|
|                                    |            | IRR                                         | 95% Conf Intervals |      | IRR                                      | 95% Conf Intervals |      |
|                                    |            |                                             | LCL                | UCL  |                                          | LCL                | UCL  |
| IMD: quint1                        | 2,478 (36) | 1.41***                                     | 1.16               | 1.70 | 1.15                                     | 0.95               | 1.40 |
| IMD: quint2                        | 1,169 (17) | 1.22*                                       | 0.98               | 1.50 | 1.07                                     | 0.85               | 1.30 |
| IMD: quint3                        | 1,397 (20) | 1.21*                                       | 0.98               | 1.48 | 1.14                                     | 0.93               | 1.39 |
| IMD: quint4                        | 1,125 (16) | 1.13                                        | 0.91               | 1.39 | 1.12                                     | 0.90               | 1.38 |
| IMD: quint5 (reference group)      | 657 (11)   | 1.00                                        | -                  | -    | 1.00                                     | -                  | -    |
| Age group: 18-30 (reference group) | 913 (13)   | 1.00                                        | -                  | -    | 1.00                                     | -                  | -    |
| Age group: 31-40                   | 1,465 (21) | 1.35**                                      | 1.13               | 1.62 | 1.62***                                  | 1.34               | 1.94 |
| Age group: 41-50                   | 1,676 (24) | 1.71***                                     | 1.43               | 2.05 | 1.93***                                  | 1.61               | 2.31 |



|                                                                    |            |         |      |      |          |      |      |
|--------------------------------------------------------------------|------------|---------|------|------|----------|------|------|
| Age group: 51-60                                                   | 2,198 (32) | 1.93*** | 1.62 | 2.29 | 2.17***  | 1.82 | 2.58 |
| Age group: 61-70                                                   | 553 (8)    | 1.77*** | 1.41 | 2.24 | 1.90***  | 1.51 | 2.41 |
| Age group: 71-80                                                   | 21 (1)     | 1.30    | 0.57 | 3.99 | 1.03     | 0.45 | 3.12 |
| Gender:Female                                                      | 4,974 (73) | 1.00    | 0.89 | 1.13 | 1.13**   | 1.01 | 1.28 |
| Gender:Male (reference group)                                      | 1,852 (27) | 1.00    | -    | -    | 1.00     | -    | -    |
| Band:1-2                                                           | 805 (12)   | -       | -    | -    | 2.53***  | 1.87 | 3.42 |
| Band:3                                                             | 1,755 (26) | -       | -    | -    | 2.25***  | 1.70 | 2.96 |
| Band:4                                                             | 691 (10)   | -       | -    | -    | 1.85***  | 1.38 | 2.47 |
| Band:5                                                             | 1,171 (17) | -       | -    | -    | 1.59***  | 1.24 | 2.03 |
| Band:6                                                             | 1,247 (18) | -       | -    | -    | 1.32**   | 1.03 | 1.69 |
| Band:7                                                             | 683 (10)   | -       | -    | -    | 1.09     | 0.83 | 1.42 |
| Band: 8-9 (reference group)                                        | 474 (7)    | -       | -    | -    | 1.00     | -    | -    |
| Staff_group: Scientific, Technical and Allied Health Professionals | 725 (11)   | -       | -    | -    | 1.14     | 0.90 | 1.45 |
| Staff_group: Additional Clinical Services (Health Care Assistants) | 1,911 (28) | -       | -    | -    | 1.72***  | 1.44 | 2.05 |
| Staff_group: Estates and Ancillary                                 | 454 (6)    | -       | -    | -    | 1.04     | 0.80 | 1.35 |
| Staff_group: Nursing and Midwifery Registered                      | 2,182 (32) | -       | -    | -    | 1.84 *** | 1.50 | 2.24 |
| Staff_group: Administrative and Clerical group (reference group)   | 1,554 (23) | -       | -    | -    | 1.00     | -    | -    |

Models based on n = 6826 observations \*\*\*  $p < 0.01$ , \*\*  $p < 0.05$ , \*  $p < 0.1$

IRR = incident rate ratio

## Discussion

We found that a relatively high proportion of the workforce of one of the largest community and mental health NHS organisations in England comes from relatively deprived areas with greater share of the working age population in deprived areas working at Mersey Care compared to the most affluent areas. Employees from these areas were however more likely to be absent from work due to sickness. This appears to be because they were more likely to be in lower wage employment and those on lower wages tended to have higher sickness absence. Staff working in nursing and nursing assistant roles also had higher sickness rates when compared to the staff working in admin and clerical roles. [16]

## Strengths and limitations

Before discussing the implications of our findings, we highlight some of the strengths and limitations of the analysis. One of the strengths of this paper is that the use of routine electronic data provided by the Mersey Care ESR overcomes some issues with non-response bias occurring in survey-based research on sickness absence. It also provides greater detail on occupation, wages, and place of residence than some analysis of data derived from sickness benefit claims. The focus on one large community and mental health NHS organisation provides a useful case study, highlighting the potential for the NHS to improve health in deprived areas through improving the health of its workforce. As with all routine data sources a limitation is the quality of coding in the data. For example, employee's ethnicity was not consistently coded in the data and therefore we were not able to investigate the extent to which sickness absence rates vary across the different ethnic groups. We were only able to access

1  
2  
3 data from one NHS organisation and therefore our analysis will not be representative of inequalities in  
4 sickness absence across the NHS. As a community and mental health provider Mersey Care has a high  
5 proportion of staff from nursing and non-medical clinical services groups compared to the NHS as a  
6 whole[17], probably leading to a greater share of the workforce in relatively lower wage jobs compared  
7 to the NHS as a whole. Employment sickness absent rates by level of deprivation would therefore  
8 probably be very different in acute hospital-based NHS organisations, and we cannot say how the  
9 pattern we observe in Mersey care differs from other similar NHS organisations.  
10  
11  
12  
13  
14  
15  
16

### 17 **Implications for policy and practice.**

18  
19 Our findings have a number of implications for NHS organisation aiming to increase employment and  
20 improve the health of disadvantaged communities through their workforce policies. Firstly, we  
21 demonstrate that a sizeable portion of this Mersey Care workforce comes from deprived neighbourhood.  
22 This demonstrates that this is feasible and if this is not the case in other similar organisations this could  
23 indicate the potential to increase recruitment form these communities. Secondly this highlights that  
24 where NHS organisations do have a large proportion of their work force living in disadvantaged areas,  
25 as we find here, improving their health and working conditions does have the potential to reduce health  
26 inequalities. Thirdly if NHS organisations are looking to recruit from deprived communities, then this  
27 may increase the prevalence of health problems in their workforce. Offering support to deal with  
28 potential unmet health needs need could be one of the strategies to reduce sickness. Support needs to  
29 reflect the health needs of the population from which staff are recruited. For example, if recruiting from  
30 more disadvantaged areas there may be a higher prevalence of mental health issues. For example,  
31 Mersey Care reviewed its Health & Wellbeing at Work strategy and is now recruiting psychologists to  
32 support staff with psychological therapy and interventions where required within the organisation.  
33 Traditional “one size fits all” ways of managing sickness absence and promoting workplace health will  
34 need revising to address inequalities in sickness absence within the workforce.  
35  
36  
37  
38  
39  
40  
41  
42  
43  
44  
45  
46  
47

### 48 **Conclusion**

49 NHS organisations potentially have large share of their workforce living in disadvantaged areas,  
50 however, these groups are likely to experience higher level of sickness absence. By increasing  
51 recruitment from these communities and developing effective policies for improving health and  
52 working conditions for these groups, the NHS can contribute to reducing health inequalities through its  
53 workforce policies.  
54  
55  
56  
57

### 58 **Funding**

1  
2  
3 BB and KD are supported by the National Institute for Health Research (NIHR) Applied Research  
4 Collaboration North West Coast (ARC NWC). BB is supported by the NIHR School for Public Health  
5 Research. This report is independent research funded by the NIHR ARC NWC. The views expressed  
6 in this publication are those of the author(s) and not necessarily those of the NIHR or the Department  
7 of Health and Social Care. Figure 1 copyright statement: Contains National Statistics data © Crown  
8 copyright and database right 2018. Contains Ordnance Survey data © Crown copyright and database  
9 right 2018.  
10  
11  
12  
13  
14  
15  
16  
17  
18

### 19 **Competing interests**

20 BB and KD are supported by the NIHR Applied Research Collaboration North West Coast; BB is  
21 supported by the NIHR School for Public Health Research; no financial relationships with any  
22 organisations that might have an interest in the submitted work in the previous three years; no other  
23 relationships or activities that could appear to have influenced the submitted work.  
24  
25  
26  
27

### 28 **Contributors**

29 KD and BB conducted the analysis. KD, WB and BB drafted the manuscript. KD, BB, WB, SW, AO,  
30 LE, JR all critically edited the manuscript. All authors approved the manuscript before submission.  
31  
32  
33

### 34 **Ethics committee approval**

35 None required.  
36  
37  
38  
39  
40

### 41 **References**

- 42 1 Bartley M, Ferrie J, Montgomery SM. Health and labour market disadvantage: unemployment,  
43 non-employment, and job insecurity. In: *Social determinants of health*. Oxford: : Oxford  
44 University Press 2005. 78–96.
- 45 2 Egan M, Bambra C, Thomas S, *et al*. The psychosocial and health effects of workplace  
46 reorganisation. 1. A systematic review of organisational-level interventions that aim to increase  
47 employee control. *J Epidemiol Community Health* 2007;**61**:945–54. doi:10/djbzfk
- 48 3 García AM. Working conditions and sickness absence: the need for action oriented research. *J*  
49 *Epidemiol Community Health* 2000;**54**:482–3. doi:10/bq4qnn
- 50 4 Vahtera J, Kivimäki M, Pentti J, *et al*. Effect of change in the psychosocial work environment on  
51 sickness absence: a seven year follow up of initially healthy employees. *J Epidemiol Community*  
52 *Health* 2000;**54**:484–93. doi:10/fwfhwk  
53  
54  
55  
56  
57  
58  
59  
60

- 1  
2  
3 5 Plan NLT. The NHS as an ‘anchor institution’. NHS Long Term Plan.  
4 <https://www.longtermplan.nhs.uk/online-version/appendix/the-nhs-as-an-anchor-institution/>  
5 (accessed 22 Oct 2020).  
6
- 7 6 Reed S, Göpfert A, Wood S, *et al.* Building healthier communities: the role of the NHS as an  
8 anchor institution. The Health Foundation 2019.  
9
- 10 7 The economic influence of the NHS at the local level. Kings Fund.  
11 2020. <https://www.kingsfund.org.uk/publications/economic-influence-nhs-local-level> (accessed  
12 22 Oct 2020).  
13
- 14 8 Public Health England. Workplace interventions to improve health and wellbeing. UCL Institute  
15 of Health Equity 2014.  
16 [https://assets.publishing.service.gov.uk/government/uploads/system/uploads/attachment\\_data/file/  
17 /355773/Briefing5a\\_Workplace\\_interventions\\_health\\_inequalities.pdf](https://assets.publishing.service.gov.uk/government/uploads/system/uploads/attachment_data/file/355773/Briefing5a_Workplace_interventions_health_inequalities.pdf)  
18
- 19 9 NHS Digital. NHS Sickness Absence Rates: Annual Summary. 2017.  
20 [https://files.digital.nhs.uk/publication/n/7/nhs\\_sickness\\_absence\\_rates\\_january-  
21 march\\_2017\\_and\\_annual\\_summary.pdf](https://files.digital.nhs.uk/publication/n/7/nhs_sickness_absence_rates_january-march_2017_and_annual_summary.pdf) (accessed 13 Dec 2020).  
22
- 23 10 Black CM, Frost D, Great Britain, *et al.* *Health at work -- an independent review of sickness  
24 absence*. Norwich: : Stationery Office 2011.  
25 [https://www.gov.uk/government/uploads/system/uploads/attachment\\_data/file/181060/health-at-  
26 work.pdf](https://www.gov.uk/government/uploads/system/uploads/attachment_data/file/181060/health-at-work.pdf) (accessed 22 Oct 2020).  
27
- 28 11 Ritchie KA, Macdonald EB, Gilmour WH, *et al.* Analysis of sickness absence among employees  
29 of four NHS trusts. *Occup Environ Med* 1999;**56**:702–8. doi:10.1136/oem.56.10.702  
30
- 31 12 Wright ME. Long-term sickness absence in an NHS teaching hospital. *Occup Med* 1997;**47**:401–  
32 6. doi:10.1093/occmed/47.7.401  
33
- 34 13 Ministry of Housing, Communities and Local Government. The English Indices of Deprivation  
35 2019. 2019.  
36
- 37 14 The NHS staff council. NHS Terms and Conditions of Service Handbook. 2019.  
38
- 39 15 McLennan D, Noble S, Noble M, *et al.* The English Indices of Deprivation 2019: technical  
40 report. Ministry of Housing, Communities and Local Government 2019.  
41
- 42 16 Barnett K, Mercer SW, Norbury M, *et al.* Epidemiology of multimorbidity and implications for  
43 health care, research, and medical education: a cross-sectional study. *The Lancet* 2012;**380**:37–  
44 43. doi:10/f2fg82  
45
- 46 17 NHS Staff Earnings Estimates March 2020, Provisional statistics. NHS Digit.  
47 [https://digital.nhs.uk/data-and-information/publications/statistical/nhs-staff-earnings-  
48 estimates/march-2020-provisional-statistics](https://digital.nhs.uk/data-and-information/publications/statistical/nhs-staff-earnings-estimates/march-2020-provisional-statistics) (accessed 21 Dec 2020).  
49  
50  
51  
52  
53  
54  
55  
56  
57  
58  
59  
60

1  
2  
3  
4  
5  
6  
7  
8  
9  
10  
11  
12  
13  
14  
15  
16  
17  
18  
19  
20  
21  
22  
23  
24  
25  
26  
27  
28  
29  
30  
31  
32  
33  
34  
35  
36  
37  
38  
39  
40  
41  
42  
43  
44  
45  
46

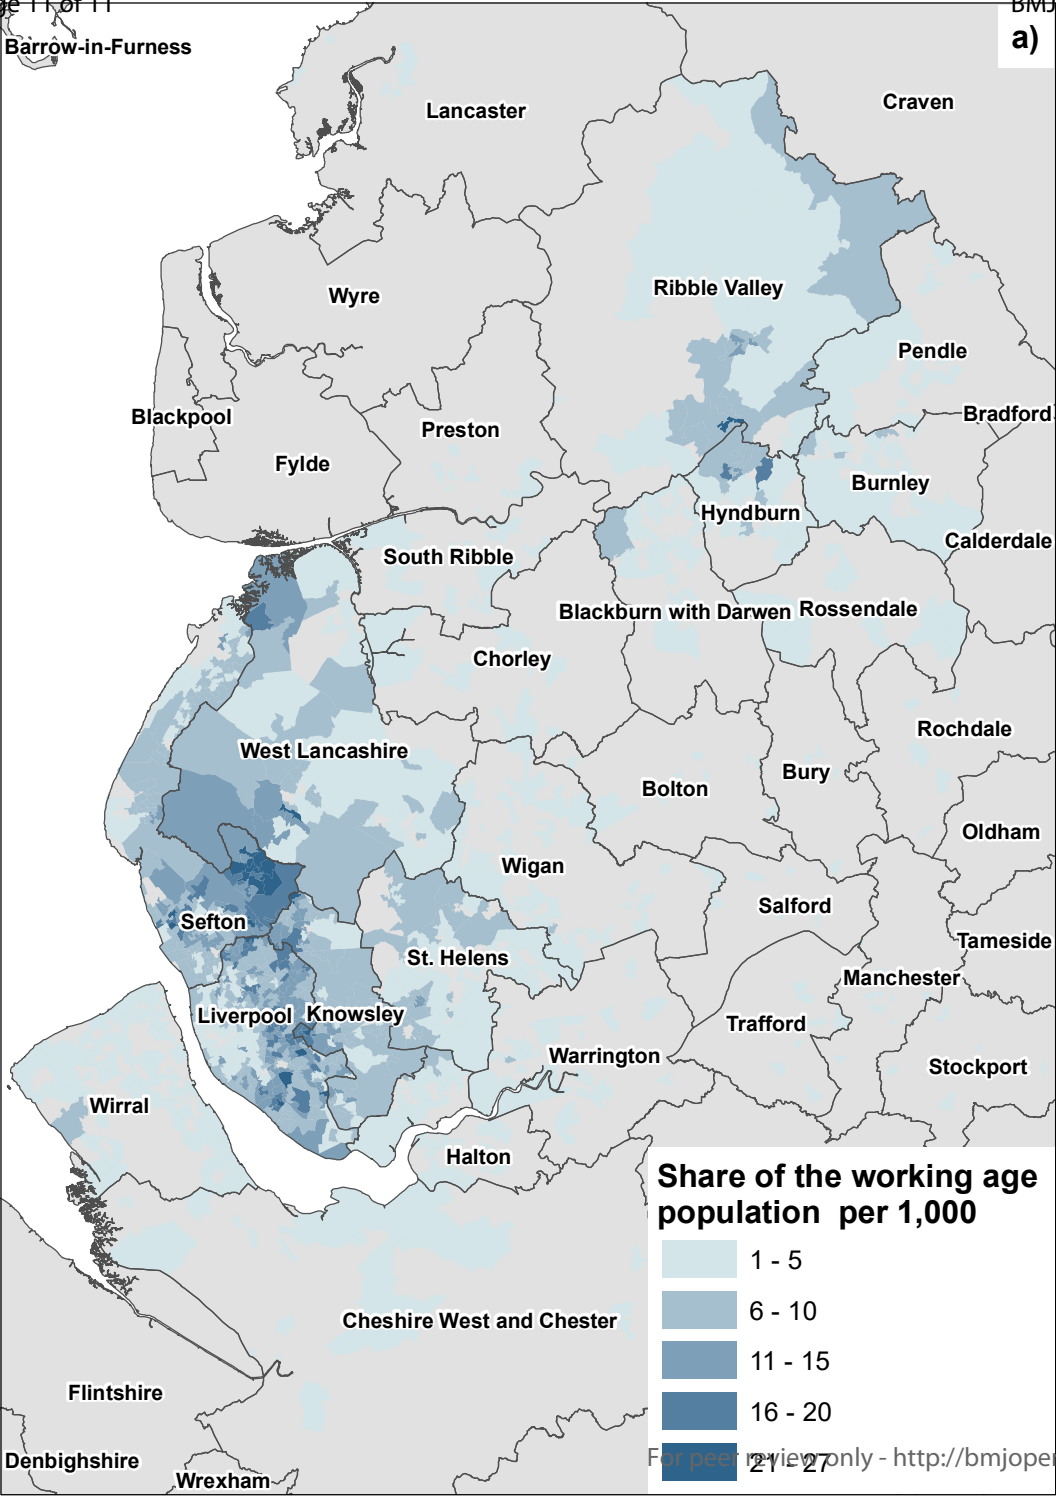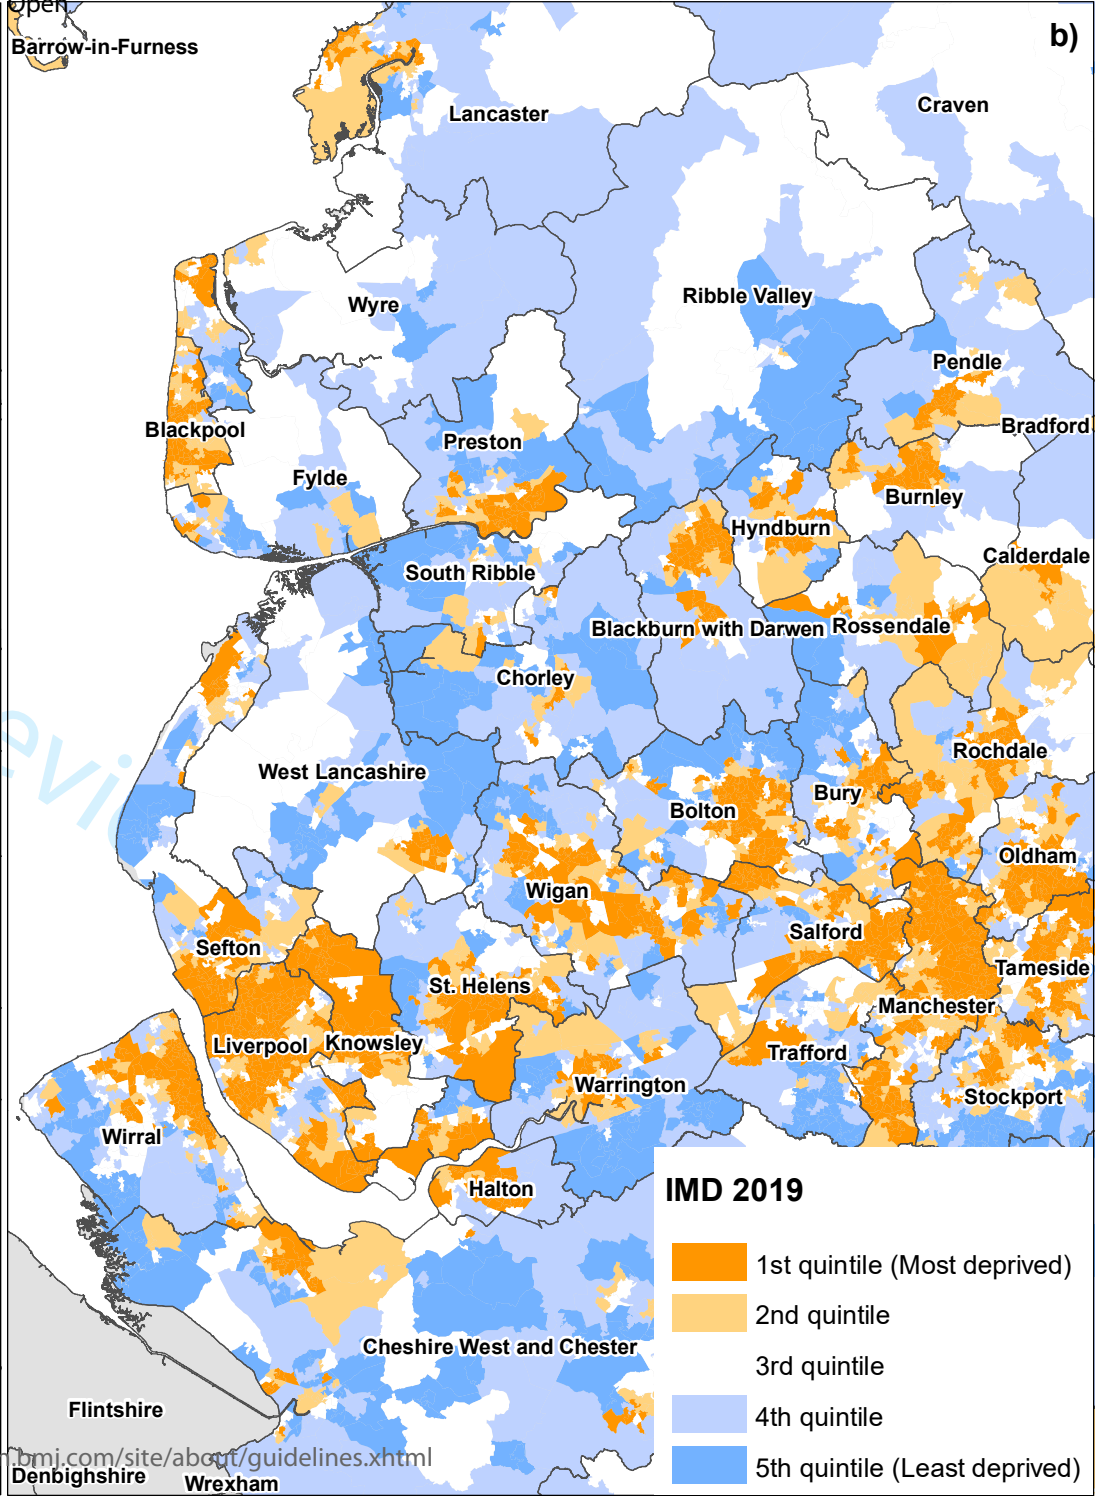

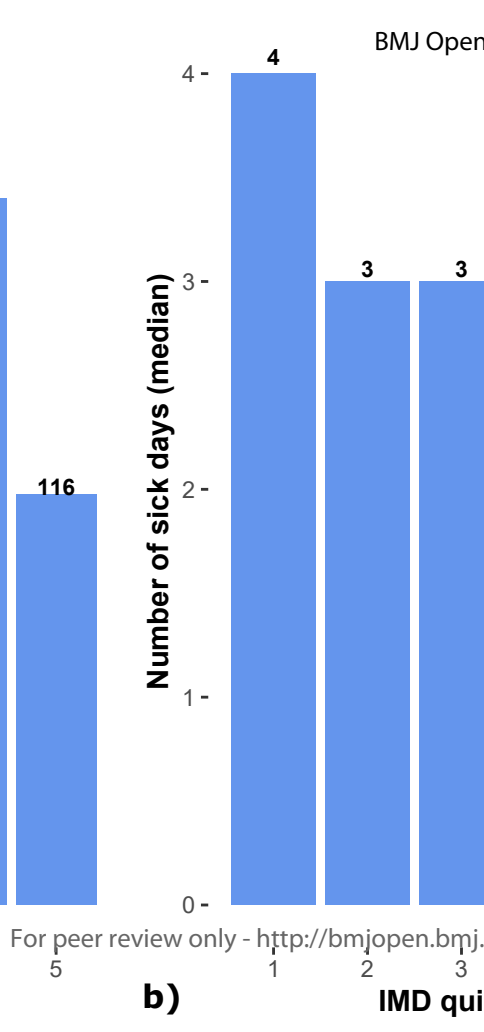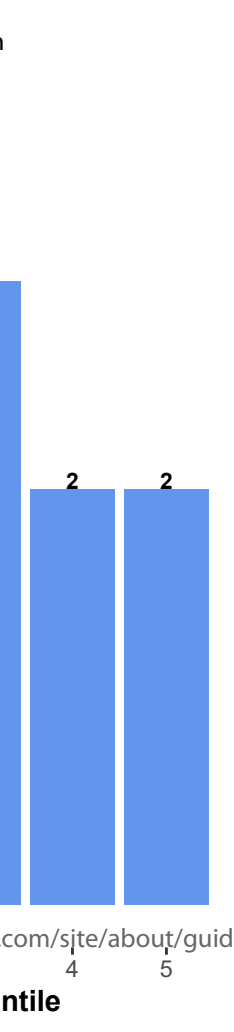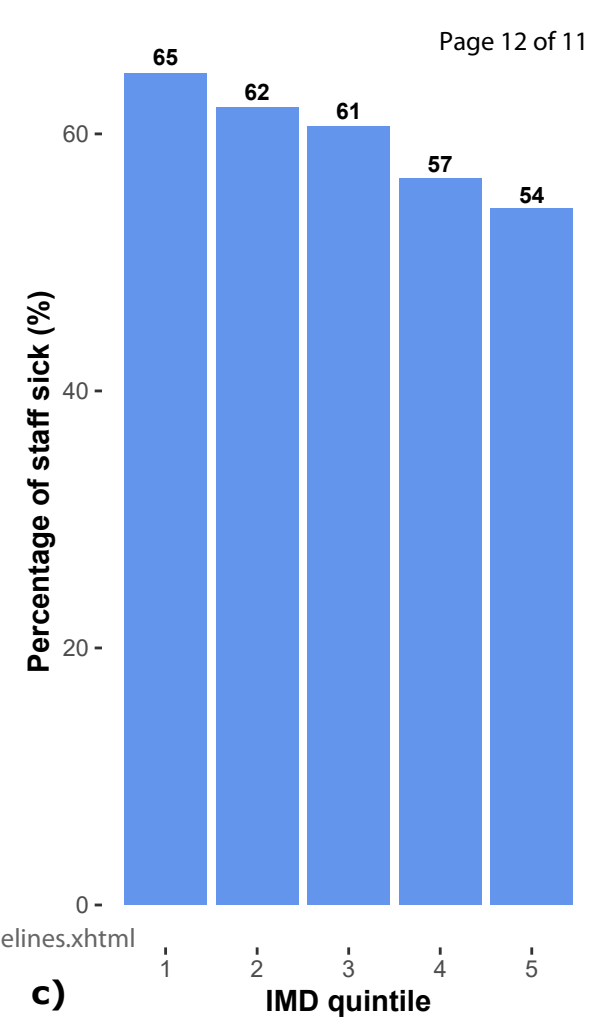



# BMJ Open

## Socioeconomic differences in recruitment and sickness absence in a large NHS health organisation – a cross-sectional study

|                                 |                                                                                                                                                                                                                                                                                                                                                                                                                             |
|---------------------------------|-----------------------------------------------------------------------------------------------------------------------------------------------------------------------------------------------------------------------------------------------------------------------------------------------------------------------------------------------------------------------------------------------------------------------------|
| Journal:                        | <i>BMJ Open</i>                                                                                                                                                                                                                                                                                                                                                                                                             |
| Manuscript ID                   | bmjopen-2021-049880.R1                                                                                                                                                                                                                                                                                                                                                                                                      |
| Article Type:                   | Original research                                                                                                                                                                                                                                                                                                                                                                                                           |
| Date Submitted by the Author:   | 04-Oct-2021                                                                                                                                                                                                                                                                                                                                                                                                                 |
| Complete List of Authors:       | Daras, Konstantinos ; University of Liverpool, Department of Public Health, Policy and Systems<br>Baker, Wesam; Mersey Care NHS Foundation Trust<br>Rafferty, Joe; Mersey Care NHS Foundation Trust<br>Oates, Amanda; Mersey Care NHS Foundation Trust<br>Edwards, Louise; Mersey Care NHS Foundation Trust<br>Wyatt, Steven; NHS Midlands and Lancashire Commissioning Support Unit<br>Barr, Ben ; University of Liverpool |
| <b>Primary Subject Heading</b>: | Health policy                                                                                                                                                                                                                                                                                                                                                                                                               |
| Secondary Subject Heading:      | Public health, Health services research                                                                                                                                                                                                                                                                                                                                                                                     |
| Keywords:                       | Health policy < HEALTH SERVICES ADMINISTRATION & MANAGEMENT, Organisation of health services < HEALTH SERVICES ADMINISTRATION & MANAGEMENT, PUBLIC HEALTH                                                                                                                                                                                                                                                                   |
|                                 |                                                                                                                                                                                                                                                                                                                                                                                                                             |

SCHOLARONE™  
Manuscripts



I, the Submitting Author has the right to grant and does grant on behalf of all authors of the Work (as defined in the below author licence), an exclusive licence and/or a non-exclusive licence for contributions from authors who are: i) UK Crown employees; ii) where BMJ has agreed a CC-BY licence shall apply, and/or iii) in accordance with the terms applicable for US Federal Government officers or employees acting as part of their official duties; on a worldwide, perpetual, irrevocable, royalty-free basis to BMJ Publishing Group Ltd ("BMJ") its licensees and where the relevant Journal is co-owned by BMJ to the co-owners of the Journal, to publish the Work in this journal and any other BMJ products and to exploit all rights, as set out in our [licence](#).

The Submitting Author accepts and understands that any supply made under these terms is made by BMJ to the Submitting Author unless you are acting as an employee on behalf of your employer or a postgraduate student of an affiliated institution which is paying any applicable article publishing charge ("APC") for Open Access articles. Where the Submitting Author wishes to make the Work available on an Open Access basis (and intends to pay the relevant APC), the terms of reuse of such Open Access shall be governed by a Creative Commons licence – details of these licences and which [Creative Commons](#) licence will apply to this Work are set out in our licence referred to above.

Other than as permitted in any relevant BMJ Author's Self Archiving Policies, I confirm this Work has not been accepted for publication elsewhere, is not being considered for publication elsewhere and does not duplicate material already published. I confirm all authors consent to publication of this Work and authorise the granting of this licence.



1  
2  
3 **Socioeconomic differences in recruitment and sickness absence in a large NHS health**  
4 **organisation – a cross-sectional study.**  
5  
6  
7

8 Dr Konstantinos Daras<sup>1\*</sup>, Wesam Baker<sup>2</sup>, Steven Wyatt<sup>3</sup>, Amanda Oates<sup>2</sup>, Dr Louise Edwards<sup>2</sup>, Dr Joe Rafferty<sup>2</sup>,  
9 Professor Ben Barr<sup>1</sup>  
10

11 <sup>1</sup>Department of Public Health, Policy and Systems, University of Liverpool, Liverpool, L69 3GL

12 <sup>2</sup>Mersey Care NHS Foundation Trust, Kings Business Park, Trust Offices/V7 Buildings, Prescot L34 1PJ

13 <sup>3</sup>The Strategy Unit, NHS Midlands and Lancashire Commissioning Support Unit, Kingston House, 438-450 High  
14 St, West Midlands B70 9LD  
15

16 \*Correspondence to Konstantinos Daras, Department of Public Health, Policy and Systems, University of  
17 Liverpool, The Farr Institute@HeRC, Waterhouse Building, 2nd Floor Block F, Liverpool L69 3GL, UK;  
18 konstantinos.daras@liverpool.ac.uk  
19

20 **Keywords:** public health policy, health inequalities, workplace health, sickness absence

21 **Word count:** 2,882  
22

23 **Abstract**

24 **Objective:**

25 This study investigates the distribution of the workforce of one large National Health Service (NHS)  
26 employer in relation to socioeconomic deprivation and how sickness absence rates varied across these  
27 levels of deprivation.  
28  
29  
30

31 **Design:**

32 Share of the working age population that was employed at the NHS organisation mapped by area  
33 deprivation. The study utilized negative binomial regression models to investigate the extent to which  
34 wage level, occupational group and area deprivation were associated with sickness absence amongst  
35 employees.  
36  
37  
38

39 **Setting:**

40 The study used electronic staff records (2018-19) of a large NHS organisation in the North West of  
41 England.  
42  
43

44 **Results:**

45 In the most deprived areas, an additional person per 1,000 working age population were employed at  
46 this NHS organisation compared to the most affluent areas. Employees from the most deprived quintile  
47 had 1.41 (95% CI 1.16 to 1.70) times the higher sickness rates than the employees from the least  
48 deprived quintile, when adjusting for age and sex. These differences were largely explained by  
49 differences in wage levels and occupation groups, with the lowest wage employees having 2.5 (95% CI  
50 1.87 to 3.42) times the sickness absence rate as the highest wage group and the nursing and midwifery  
51 employees having 1.8 (95% CI 1.50 to 2.24) times the sickness absence rate as the administrative and  
52 clerical group.  
53  
54  
55  
56  
57

58 **Conclusion:**  
59  
60

1  
2  
3 This large NHS organisation employed people disproportionately from deprived areas. They were  
4 considerably more likely to experience sickness absence compared to people from affluent areas. This  
5 appears to be because they were more likely to be in lower wage employment and employed in nursing  
6 and nursing assistant. Workplace health policies need to target these workers, adapting to their needs  
7 whilst enabling improvements in their working conditions, pay and career progression.  
8  
9  
10

### 11 12 **Strengths and limitations of this study**

- 14 • One of the strengths of this study is that the use of routine electronic data provided by the  
15 Mersey Care Electronic Staff Record overcomes some issues with non-response bias occurring  
16 in survey-based research on sickness absence.  
17
- 18 • The focus on one large community and mental health NHS organisation provides a useful case  
19 study, highlighting the potential for the NHS to improve health in deprived areas through  
20 improving the health of its workforce.  
21
- 22 • As with all routine data sources a limitation is the quality of coding in the data. For example,  
23 employee's ethnicity was not consistently coded in the data and therefore we were not able to  
24 investigate the extent to which sickness absence rates vary across the different ethnic groups.  
25
- 26 • Sickness absent rates by level of deprivation would probably be very different in acute hospital-  
27 based NHS organisations, and we cannot say how the pattern we observe in Mersey Care differs  
28 from other similar NHS organisations.  
29  
30  
31  
32  
33  
34

### 35 **Introduction**

36  
37 The National Health Service (NHS) is one of the largest employers in the world, and is the biggest in  
38 Europe, with over 1.3 million staff (3.5% of the working age population). The role of the NHS, not just  
39 as a provider of health services but also as a major influence on local economies has become  
40 increasingly recognised, with the NHS long term plan[1] recognising the role of the NHS as an “Anchor  
41 Institution” [2] - that can positively influence the social, economic and environmental factors that help  
42 create good health and reduce health inequalities. One way the NHS could do this is by increasing  
43 recruitment from more disadvantaged communities, whilst improving the health of staff from these  
44 communities through workplace health policies. There is strong evidence showing that work is  
45 generally good for physical and mental health and well-being.[3] This depends, however, on the nature  
46 of working conditions. Evidence shows that poor working conditions are detrimental to health[4] and  
47 have been linked to sickness absence while improvement in psychosocial working conditions can  
48 reduce the risk of illness among the employees.[5] Vahtera et al[6] has shown that workers in jobs  
49 with poor participation in decision making, poor skill discretion, high job demands and low job control  
50 had more than double the risk of sick leave than workers in jobs without these adverse conditions. It  
51 therefore follows that, for the NHS to contribute to reduced health inequalities through its recruitment  
52  
53  
54  
55  
56  
57  
58  
59  
60

1  
2  
3 and workplace policies, it needs to increase recruitment from more disadvantaged communities. NHS  
4 employers also need to understand the health needs of these members of staff, relative to those from  
5 less disadvantaged communities, so that they can target policies and practice to promote their health.  
6 Often policies to improve workplace health are not tailored to the differences in health needs of different  
7 socioeconomic groups and therefore can increase inequalities as uptake is often greater amongst more  
8 advantaged groups. [7]  
9  
10  
11  
12  
13

14 Whilst there is evidence that the NHS makes up a greater share of employment in some of the less  
15 affluent regions of England such as the North West than other parts of the country[8] , there is little  
16 evidence assessing the socioeconomic profile of employees of NHS organisations in relation to the  
17 communities in which they are based. Whilst previous studies have shown that sickness absence in  
18 NHS organisations is concentrated in particular occupational groups[7], there has been limited research  
19 investigating how sickness absence varies across other socioeconomic groups of NHS employees.  
20 Studies in other workplaces such as the Whitehall II study of civil servants, have shown higher sickness  
21 absence rates amongst junior grade compared to senior grades[7,9,10] , however, there has been limited  
22 similar analysis of NHS employee. In particular previous studies have not analysed patterns of sickness  
23 absence in relation to the level of deprivation of the communities from which employees are recruited,  
24 or whether these patterns are explained by individual socioeconomic characteristics such as wages  
25 bands or occupation. Understanding both the patterns of recruitment in relation to these levels of  
26 deprivation and how health needs vary across deprivation levels will be important to inform strategies  
27 that aim to utilise NHS recruitment and workplace health policies to reduce health inequalities.  
28  
29  
30  
31  
32  
33  
34  
35  
36  
37

38 To inform these strategies this study aimed to investigate the distribution of the workforce of one large  
39 NHS employer in relation to socioeconomic deprivation and how sickness absence rates varied across  
40 levels of deprivation using workforce data from a large community and mental Health NHS  
41 organisation based in the North West of England.  
42  
43  
44  
45

## 46 **Methods**

### 47 *Study design and setting*

48 This cross-sectional study used anonymised data on 7,274 substantive staff employed during the  
49 financial year 2018-19 at Mersey Care NHS Foundation Trust extracted from their Electronic Staff  
50 Records (ESR). Mersey Care is one largest NHS Providers of mental health, learning disabilities,  
51 addictions and community physical health care in England, providing community health service across  
52 Merseyside in the North West of England .[11]  
53  
54  
55  
56  
57

### 58 *Data and measures*

1  
2  
3 To understand the distribution of the workforce and variation in levels of sickness absence we define 3  
4 outcomes. Firstly, the Mersey Care workforce as a share of the working age population calculated as  
5 the number of employees divided by the estimated population (per 1000 people) living in each area in  
6 2018 obtained from the Office for National Statistics. [12] Secondly the sickness absence rate calculated  
7 as the average number of sick days per employee and thirdly, the sickness absence prevalence as the  
8 percentage of staff with at least one sickness absence during the year.  
9  
10  
11  
12  
13

14 Age was categorised into 6 age groups (18-30, 31-40, 41-50, 51-60, 61-70 and 71-80) and gender into  
15 two groups (male, female) as recorded in the ESR. Wages were defined based on the 9 pay bands used  
16 by the NHS [13] (band 1 – lowest pay rate and band 9 – highest pay rate). To avoid small number effects  
17 introduced in our analysis (pay band 1, included only 5 employees, whilst pay band 9, included only 9  
18 employees), we combined pay bands 1 and 2 along with pay bands 8 and 9.  
19  
20  
21  
22  
23

24 Each NHS staff member is assigned to one of the 5 occupational groups: a) Scientific, Technical and  
25 Allied Health Professionals, b) Additional Clinical Services (Health Care Assistants), c) Estates and  
26 Ancillary, d) Nursing and Midwifery Registered, and e) Administrative and Clerical group. As Mersey  
27 Care is a primarily a community health provider it has relatively few medical staff. To ensure that no  
28 individuals could be identified from the data, all medical (junior to consultant grade) staff, Executive  
29 Directors and Board members were excluded from the analysis, leaving 7,005 staff members for  
30 analysis. Postcode data was mapped to Lower Super Output Area (LSOA) which are small geographical  
31 zones (mean population 1,500) in England that are routinely used for statistical analysis. Each LSOA  
32 was then linked to a small area based measure of deprivation – the indices of multiple deprivation  
33 (IMD).[14] The IMD is a composite indicator of the level of deprivation for small geographical areas  
34 (LSOAs) across England, based on seven domains: Income deprivation, Employment deprivation,  
35 Education, Skills and Training deprivation, Health and Disability deprivation, Crime, Barriers to  
36 Housing & Services and the Living Environment deprivation. Quintiles are calculated by ranking the  
37 LSOAs in England from most deprived (quintile 1) to least deprived (quintile 5) and dividing them into  
38 5 equal groups. For 179 people their postcode could not be mapped to LSOA, and they were therefore  
39 excluded from the analysis giving 6,826 employees in the final analysis.  
40  
41  
42  
43  
44  
45  
46  
47  
48  
49

#### 50 51 *Statistical Analysis*

52 First, to investigate patterns of recruitment of employees to Mersey Care, we investigated the  
53 geographical distribution of Mersey Care staff and how this related to the level of socioeconomic  
54 deprivation. We defined the area from which Mersey Care workers could potentially have been  
55 recruited as all local authority areas in which at least 5 Mersey Care employees were resident – this  
56 gave 28 local authority areas from across the North West with a total working age population of  
57  
58  
59  
60

1  
2  
3 3,825,255. We mapped the share the working age population that worked for Mersey Care for each  
4 LSOA in this area and plotted the share for each deprivation quintile (per 1,000 people).  
5  
6  
7

8 We then estimated the number of sick days per employee and the percentage of staff with any sickness  
9 absence in the year for each deprivation quintile. To investigate the relationship between the average  
10 number of days of sickness absence per employee and area deprivation, whilst adjusting for the age and  
11 gender of employees, we used a negative binomial regression model. The exponentiated coefficients  
12 from this model provide an estimate of the adjusted sickness absence rate ratio (RR) for each group  
13 relative to the baseline.  
14  
15  
16  
17

18  
19 In a second model to investigate whether the relationship with area deprivation was explained by  
20 patterns of sickness absence between wage and occupational groups we additionally included the wage  
21 band and the occupational group to explore the extent to which these explained the any association with  
22 deprivation. We used a negative binomial model rather than a Poisson model to account for  
23 overdispersion of the data. We also examined the multicollinearity between the variables in both  
24 models using the Variance Inflation Factor (VIF) measure. All analysis was carried out in R version  
25 3.6.3.  
26  
27  
28  
29

### 30 31 *Patient and public involvement*

32  
33 No patients were involved in setting the research question or the outcome measures, nor were they  
34 involved in the design or implementation of the study.  
35  
36  
37

## 38 **Results**

39  
40 Figure 1a shows the geographical distribution of the Mersey Care workforce as a share of the working  
41 age population. Employees are spread across the North West although concentrated in the relatively  
42 deprived areas of Merseyside as well as in the more affluent areas of the Ribble Valley (see figure 1b,  
43 for a map of deprivation in the same area).  
44  
45  
46  
47

48  
49 Overall, the share of the working age population from the most deprived areas that worked at Mersey  
50 Care was very high 1.97 per 1,000 working age population (figure 2a). In the most deprived areas, an  
51 additional person per 1,000 working age population were employed at this NHS organisation compared  
52 to the most affluent areas. This meant that 36% of the Mersey Care workforce lived in the most deprived  
53 areas, whereas only 11% lived in the least deprived areas (see supplemental Table 1). The highest share  
54 of the working age population employed at Mersey Care was from areas of intermediate deprivation  
55 (quintile 3). Overall, the mean number of sickness absence days per employees was 22 days (median 3  
56 days) and 61% of employees were on sick leave at least once during the year. Figure 2b and 2c shows  
57  
58  
59  
60

that there was a clear gradient across deprivation quintiles in levels of sickness absence. This was true in terms of the proportion of staff that had any sickness absence as well as the mean number of sick days per employee.

The negative binomial regression analysis for both models is shown in Table 1. Results from the model 1 showed that the sickness absence rate for the most deprived quintile was 1.41 times higher than the least deprived quintile (reference group) (95% CI 1.16 to 1.70), when just adjusting for age and sex. After controlling for wage band and occupational group the association with deprivation was reduced with the most deprived quintile exhibiting only slightly higher adjusted risk of sickness absence, that was no longer statistically significant at the 5% level. This analysis indicates that the association with area deprivation was largely explained by the higher sickness rate in the lower wage bands, who were more likely to live in deprived areas. Employees at bands 1-2 (Salaries of ~ £18,000 to £19,000 per annum) and 3 (£19,000-£21,000) had 2.53 (95% CI 1.87 to 3.42) and 2.25 (95% CI 1.70 to 2.96) times the sickness absence rate than high wage band employees (bands 8-9: £45,500 to £104,000). The correlation between low wages and area deprivation was high with 47% of the workforce from the most deprived areas being on wage bands 1-3, compared to 7% of those living in less deprived areas. Adjusted sickness absence rates for the staff in Additional Clinical services group (largely care assistants) and the Nursing and Midwifery Registered group were 1.72 (95% CI 1.44 to 2.05) and 1.84 (95% CI 1.50 to 2.24) times higher than the Administrative and Clerical group. These groups were also more likely to live in deprived areas than other occupational groups indicating that occupation also explained some of the relationship between sickness absence and area deprivation.

**Table 1: Results from two negative binomial regression models: Model 1 includes only demographic variables and Model 2 includes additional wage bands and occupational groups variables.**

|                                               | n (%)      | Model 1 (without Wage Bands & Occupational groups) |                    |      | Model 2 (with Wage Bands & Occupational groups) |                    |      |
|-----------------------------------------------|------------|----------------------------------------------------|--------------------|------|-------------------------------------------------|--------------------|------|
|                                               |            | Rate Ratio                                         | 95% Conf Intervals |      | Rate Ratio                                      | 95% Conf Intervals |      |
|                                               |            |                                                    | LCL                | UCL  |                                                 | LCL                | UCL  |
| <b>Area deprivation</b>                       |            |                                                    |                    |      |                                                 |                    |      |
| Quintile 1 (most deprived)                    | 2,478 (36) | 1.41***                                            | 1.16               | 1.70 | 1.15                                            | 0.95               | 1.40 |
| Quintile 2                                    | 1,169 (17) | 1.22*                                              | 0.98               | 1.50 | 1.07                                            | 0.85               | 1.30 |
| Quintile 3                                    | 1,397 (20) | 1.21*                                              | 0.98               | 1.48 | 1.14                                            | 0.93               | 1.39 |
| Quintile 4                                    | 1,125 (16) | 1.13                                               | 0.91               | 1.39 | 1.12                                            | 0.90               | 1.38 |
| Quintile 5 (least deprived - reference group) | 657 (11)   | 1.00                                               | -                  | -    | 1.00                                            | -                  | -    |
| <b>Age groups</b>                             |            |                                                    |                    |      |                                                 |                    |      |
| 71-80                                         | 21 (1)     | 1.30                                               | 0.57               | 3.99 | 1.03                                            | 0.45               | 3.12 |
| 61-70                                         | 553 (8)    | 1.77***                                            | 1.41               | 2.24 | 1.90***                                         | 1.51               | 2.41 |
| 51-60                                         | 2,198 (32) | 1.93***                                            | 1.62               | 2.29 | 2.17***                                         | 1.82               | 2.58 |
| 41-50                                         | 1,676 (24) | 1.71***                                            | 1.43               | 2.05 | 1.93***                                         | 1.61               | 2.31 |
| 31-40                                         | 1,465 (21) | 1.35**                                             | 1.13               | 1.62 | 1.62***                                         | 1.34               | 1.94 |



|                                                       |            |      |      |      |          |      |      |
|-------------------------------------------------------|------------|------|------|------|----------|------|------|
| 18-30 (reference group)                               | 913 (14)   | 1.00 | -    | -    | 1.00     | -    | -    |
| <b>Sex</b>                                            |            |      |      |      |          |      |      |
| Female                                                | 4,974 (73) | 1.00 | 0.89 | 1.13 | 1.13**   | 1.01 | 1.28 |
| Male (reference group)                                | 1,852 (27) | 1.00 | -    | -    | 1.00     | -    | -    |
| <b>Wage Bands</b>                                     |            |      |      |      |          |      |      |
| 1-2                                                   | 805 (12)   | -    | -    | -    | 2.53***  | 1.87 | 3.42 |
| 3                                                     | 1,755 (26) | -    | -    | -    | 2.25***  | 1.70 | 2.96 |
| 4                                                     | 691 (10)   | -    | -    | -    | 1.85***  | 1.38 | 2.47 |
| 5                                                     | 1,171 (17) | -    | -    | -    | 1.59***  | 1.24 | 2.03 |
| 6                                                     | 1,247 (18) | -    | -    | -    | 1.32**   | 1.03 | 1.69 |
| 7                                                     | 683 (10)   | -    | -    | -    | 1.09     | 0.83 | 1.42 |
| 8-9 (reference group)                                 | 474 (7)    | -    | -    | -    | 1.00     | -    | -    |
| <b>Occupational groups</b>                            |            |      |      |      |          |      |      |
| Scientific, Technical and Allied Health Professionals | 725 (11)   | -    | -    | -    | 1.14     | 0.90 | 1.45 |
| Additional Clinical Services (Health Care Assistants) | 1,911 (28) | -    | -    | -    | 1.72***  | 1.44 | 2.05 |
| Estates and Ancillary                                 | 454 (6)    | -    | -    | -    | 1.04     | 0.80 | 1.35 |
| Nursing and Midwifery Registered                      | 2,182 (32) | -    | -    | -    | 1.84 *** | 1.50 | 2.24 |
| Administrative and Clerical group (reference group)   | 1,554 (23) | -    | -    | -    | 1.00     | -    | -    |

Models based on n = 6826 observations \*\*\*  $p < 0.01$ , \*\*  $p < 0.05$ , \*  $p < 0.1$

Analysis of multicollinearity between the variables in both models (see supplemental Table 2) indicated using Variance Inflation Factors (VIF) of less than 2.0 suggesting that multicollinearity was not a cause for concern.

## Discussion

We found that a relatively high proportion of the workforce of one of the largest community and mental health NHS organisations in England comes from relatively deprived areas with greater share of the working age population in deprived areas working at Mersey Care compared to the most affluent areas. Employees from these areas were however more likely to be absent from work due to sickness. This appears to be because they were more likely to be in lower wage employment and employed in nursing and nursing assistant. Those on lower wages and in those occupations tended to have higher sickness absence.

Socio-economic differences in sickness absence are well established and previous studies have found that sickness absence increases with decreasing socioeconomic status [15–17] but few specifically concentrated in the health sector [18–20] and considered the breadth of deprivation experienced by employees in the communities in which they live in. [21] This study supports the need for further investigation of sickness absence outside of employees' narrow work-related environment by understanding the patterns of recruitment by area deprivation. Potentially this could provide a basis for strategy intended for reducing health inequalities where employers could ensure recruitment from

1  
2  
3 deprived neighbourhoods and ensure those cohorts are supported with effective workplace health  
4 policies that work in more disadvantaged groups.  
5  
6  
7

8 A recent systematic review [22] by National Institute for Health and Care Excellence (NICE) found  
9 some weak evidences for workplace health intervention reducing recurrent short-term sickness absence  
10 but there was no evidence that evaluated differences in effectiveness by socioeconomic status. This  
11 highlights the importance of (1) targeting such policies at more disadvantaged groups and also (2)  
12 developing evidence base for effective interventions in these groups. Whilst this study doesn't provide  
13 evidence for the latter, it does highlight the need to target such policies in NHS organisation similar to  
14 Mersey Care by occupation and wage band which would largely address difference between deprivation  
15 groups. Intervention studies examining sickness absence rates should consider the combination of all 3  
16 factors (occupation, wage band and deprivation background).  
17  
18  
19  
20  
21  
22

### 23 **Strengths and limitations**

24 Before discussing the implications of our findings, we highlight some of the strengths and limitations  
25 of the analysis. One of the strengths of this paper is that the use of routine electronic data provided by  
26 the Mersey Care ESR overcomes some issues with non-response bias occurring in survey-based  
27 research on sickness absence. It also provides greater detail on occupation, wages, and place of  
28 residence than some analysis of data derived from sickness benefit claims. The focus on one large  
29 community and mental health NHS organisation provides a useful case study, highlighting the potential  
30 for the NHS to improve health in deprived areas through improving the health of its workforce. As  
31 with all routine data sources a limitation is the quality of coding in the data. For example, employee's  
32 ethnicity was not consistently coded in the data and therefore we were not able to investigate the extent  
33 to which sickness absence rates vary across the different ethnic groups. We were only able to access  
34 data from one NHS organisation and therefore our analysis will not be representative of inequalities in  
35 sickness absence across the NHS. As a community and mental health provider Mersey Care has a high  
36 proportion of staff from nursing and non-medical clinical services groups compared to the NHS as a  
37 whole, probably leading to a greater share of the workforce in relatively lower wage jobs compared to  
38 the NHS as a whole. Sickness absent rates by level of deprivation may be different in acute hospital-  
39 based NHS organisations, and we cannot say how the pattern we observe in Mersey Care differs from  
40 other similar NHS organisations.  
41  
42  
43  
44  
45  
46  
47  
48  
49  
50  
51  
52  
53  
54

### 55 **Implications for policy and practice.**

56 Our findings have a number of implications for NHS organisation aiming to address health inequalities  
57 through recruitment from disadvantaged communities and improving the health of these employees  
58 through workplace health policies. Firstly, we demonstrate that a sizeable portion of this Mersey Care  
59  
60



workforce comes from deprived neighbourhoods, highlighting the potential for NHS employment policies to have an impact on the employment and health of these communities, through its recruitment and workplace health policies. Secondly the higher level of sickness absence in employees from these communities mean that NHS organisations aiming to recruit from deprived communities are likely to see an increase in sickness absence in their workforce. Effective workplace health policies offering support to deal with potential unmet health needs need could be one of the strategies to reduce sickness. Support needs to reflect the health needs of the population from which staff are recruited. For example, if recruiting from more disadvantaged areas there may be a higher prevalence of mental health issues. For example, Mersey Care reviewed its Health & Wellbeing at Work strategy and is now recruiting psychologists to support staff with psychological therapy and interventions where required within the organisation. Traditional “one size fits all” ways of managing sickness absence and promoting workplace health will need revising to address inequalities in sickness absence within the workforce.

### **Conclusion**

In summary, our findings suggest that a relatively high proportion of the workforce of one of the largest NHS organisations in England comes from relatively deprived areas with employees from these areas more likely to be absent from work due to sickness. While most of the differences in sickness absence rates was associated with employee’s wage band and occupation group, other factors outside of employee’s working environment such as community factors in which they live in may explain some of the remaining differences in sickness absence. By increasing recruitment from these communities and developing effective policies for improving health and working conditions for these groups, the NHS can contribute to reducing health inequalities through its workforce policies.

### **Contributors**

KD and BB conducted the analysis. KD, WB and BB drafted the manuscript. KD, BB, WB, SW, AO, LE, JR all critically edited the manuscript. All authors approved the manuscript before submission.

### **Competing interests**

BB and KD are supported by the NIHR Applied Research Collaboration North West Coast; BB is supported by the NIHR School for Public Health Research; no financial relationships with any organisations that might have an interest in the submitted work in the previous three years; no other relationships or activities that could appear to have influenced the submitted work.

### Funding

BB and KD are supported by the National Institute for Health Research (NIHR) Applied Research Collaboration North West Coast (ARC NWC). BB is supported by the NIHR School for Public Health Research. This report is independent research funded by the NIHR ARC NWC. The views expressed in this publication are those of the author(s) and not necessarily those of the NIHR or the Department of Health and Social Care. Figure 1 copyright statement: Contains National Statistics data © Crown copyright and database right 2018. Contains Ordnance Survey data © Crown copyright and database right 2018.

### Data availability statement

Data may be obtained from a third party and are not publicly available.

### Ethics committee approval

None required.

### References

- 1 Plan NLT. The NHS as an ‘anchor institution’. NHS Long Term Plan. <https://www.longtermplan.nhs.uk/online-version/appendix/the-nhs-as-an-anchor-institution/> (accessed 22 Oct 2020).
- 2 Reed S, Göpfert A, Wood S, *et al*. Building healthier communities: the role of the NHS as an anchor institution. The Health Foundation 2019.
- 3 Waddell G, Burton K. *Is Work Good for Health and Well-being?* London: : TSO 2006.
- 4 Egan M, Bambra C, Thomas S, *et al*. The psychosocial and health effects of workplace reorganisation. 1. A systematic review of organisational-level interventions that aim to increase employee control. *J Epidemiol Community Health* 2007;**61**:945–54. doi:10/djbzfk
- 5 García AM. Working conditions and sickness absence: the need for action oriented research. *J Epidemiol Community Health* 2000;**54**:482–3. doi:10/bq4qnn
- 6 Vahtera J, Kivimäki M, Pentti J, *et al*. Effect of change in the psychosocial work environment on sickness absence: a seven year follow up of initially healthy employees. *J Epidemiol Community Health* 2000;**54**:484–93. doi:10/fwfhwk
- 7 Black CM, Frost D, Great Britain, *et al*. *Health at work -- an independent review of sickness absence*. Norwich: : Stationery Office 2011. [https://www.gov.uk/government/uploads/system/uploads/attachment\\_data/file/181060/health-at-work.pdf](https://www.gov.uk/government/uploads/system/uploads/attachment_data/file/181060/health-at-work.pdf) (accessed 22 Oct 2020).

- 1
  - 2
  - 3
  - 4
  - 5
  - 6
  - 7
  - 8 Maguire D. The economic influence of the NHS at the local level. Kings Fund. 2020.<https://www.kingsfund.org.uk/publications/economic-influence-nhs-local-level> (accessed 13 Apr 2022).
  - 9
  - 10
  - 11
  - 12
  - 13
  - 14
  - 15
  - 16
  - 17
  - 18
  - 19
  - 20
  - 21
  - 22
  - 23
  - 24
  - 25
  - 26
  - 27
  - 28
  - 29
  - 30
  - 31
  - 32
  - 33
  - 34
  - 35
  - 36
  - 37
  - 38
  - 39
  - 40
  - 41
  - 42
  - 43
  - 44
  - 45
  - 46
  - 47
  - 48
  - 49
  - 50
  - 51
  - 52
  - 53
  - 54
  - 55
  - 56
  - 57
  - 58
  - 59
  - 60
- 9 Marmot M, Feeney A, Shipley M, *et al.* Sickness absence as a measure of health status and functioning: from the UK Whitehall II study. *J Epidemiol Community Health* 1995;**49**:124–30. doi:10/c67q9q
  - 10 North F, Syme SL, Feeney A, *et al.* Explaining socioeconomic differences in sickness absence: the Whitehall II Study. *Br Med J* 1993;**306**:361–6. doi:10/dqp5xb
  - 11 Ministry of Housing, Communities and Local Government. The English Indices of Deprivation 2019. 2019.
  - 12 Office for National Statistics. Lower layer Super Output Area population estimates. <https://www.ons.gov.uk/peoplepopulationandcommunity/populationandmigration/populationestimates/datasets/lowersuperoutputareamidyearpopulationestimates> (accessed 23 Sep 2021).
  - 13 The NHS staff council. NHS Terms and Conditions of Service Handbook. 2019.
  - 14 McLennan D, Noble S, Noble M, *et al.* The English Indices of Deprivation 2019: technical report. Ministry of Housing, Communities and Local Government 2019.
  - 15 Moncada S, Navarro A, Cortès I, *et al.* Sickness leave, administrative category and gender: results from the "Casa Gran" project. *Scand J Public Health* 2002;**30**:26–33. doi:10/dbvnmx
  - 16 Piha K, Martikainen P, Rahkonen O, *et al.* Trends in socioeconomic differences in sickness absence among Finnish municipal employees 1990–99. *Scand J Public Health* 2007;**35**:348–55. doi:10/b7zchk
  - 17 Sumanen H, Pietiläinen O, Mänty M. Self-Certified Sickness Absence among Young Municipal Employees—Changes from 2002 to 2016 and Occupational Class Differences. *Int J Environ Res Public Health* 2017;**14**:1131. doi:10/gck78q
  - 18 Lim A, Chongsuvivatwong V, Geater A, *et al.* Influence of Work Type on Sickness Absence among Personnel in a Teaching Hospital. *J Occup Health* 2002;**44**:254–63. doi:10/d5xhpp
  - 19 Kristensen TR, Jensen SM, Kreiner S, *et al.* Socioeconomic status and duration and pattern of sickness absence. A 1-year follow-up study of 2331 hospital employees. *BMC Public Health* 2010;**10**:643. doi:10/dqsqqj
  - 20 Jones RP. NHS sickness absence in England: hidden patterns. *Br J Healthc Manag* 2020;**26**:1–11. doi:10/gmsz4v
  - 21 Wynn P, Low A. The effect of social deprivation on local authority sickness absence rates. *Occup Med* 2008;**58**:263–7. doi:10/b3jstr

- 22 NICE. Workplace Health: Long-Term Sickness Absence and Capability to Work. NICE Guideline [NG146]. 2019.<https://www.nice.org.uk/guidance/ng146/evidence/a-reducing-recurrent-shortterm-sickness-absence-pdf-6967146926>

For peer review only

1  
2  
3  
4  
5  
6  
7  
8  
9  
10  
11  
12  
13  
14  
15  
16  
17  
18  
19  
20  
21  
22  
23  
24  
25  
26  
27  
28  
29  
30  
31  
32  
33  
34  
35  
36  
37  
38  
39  
40  
41  
42  
43  
44  
45  
46  
47  
48  
49  
50  
51  
52  
53  
54  
55  
56  
57  
58  
59  
60

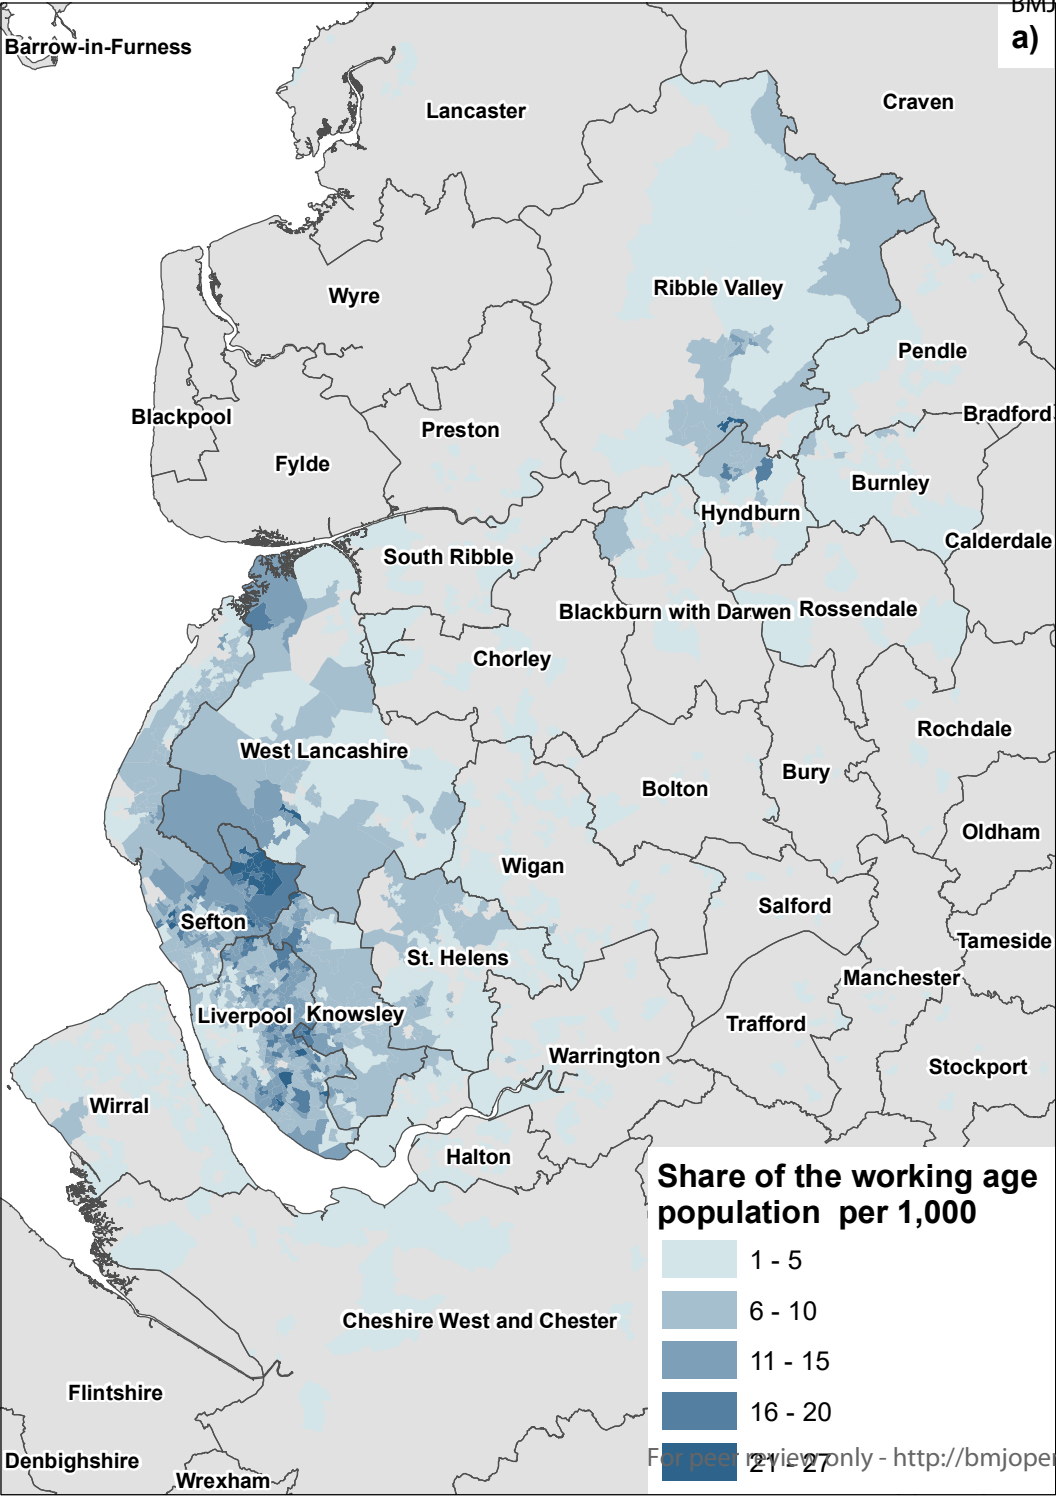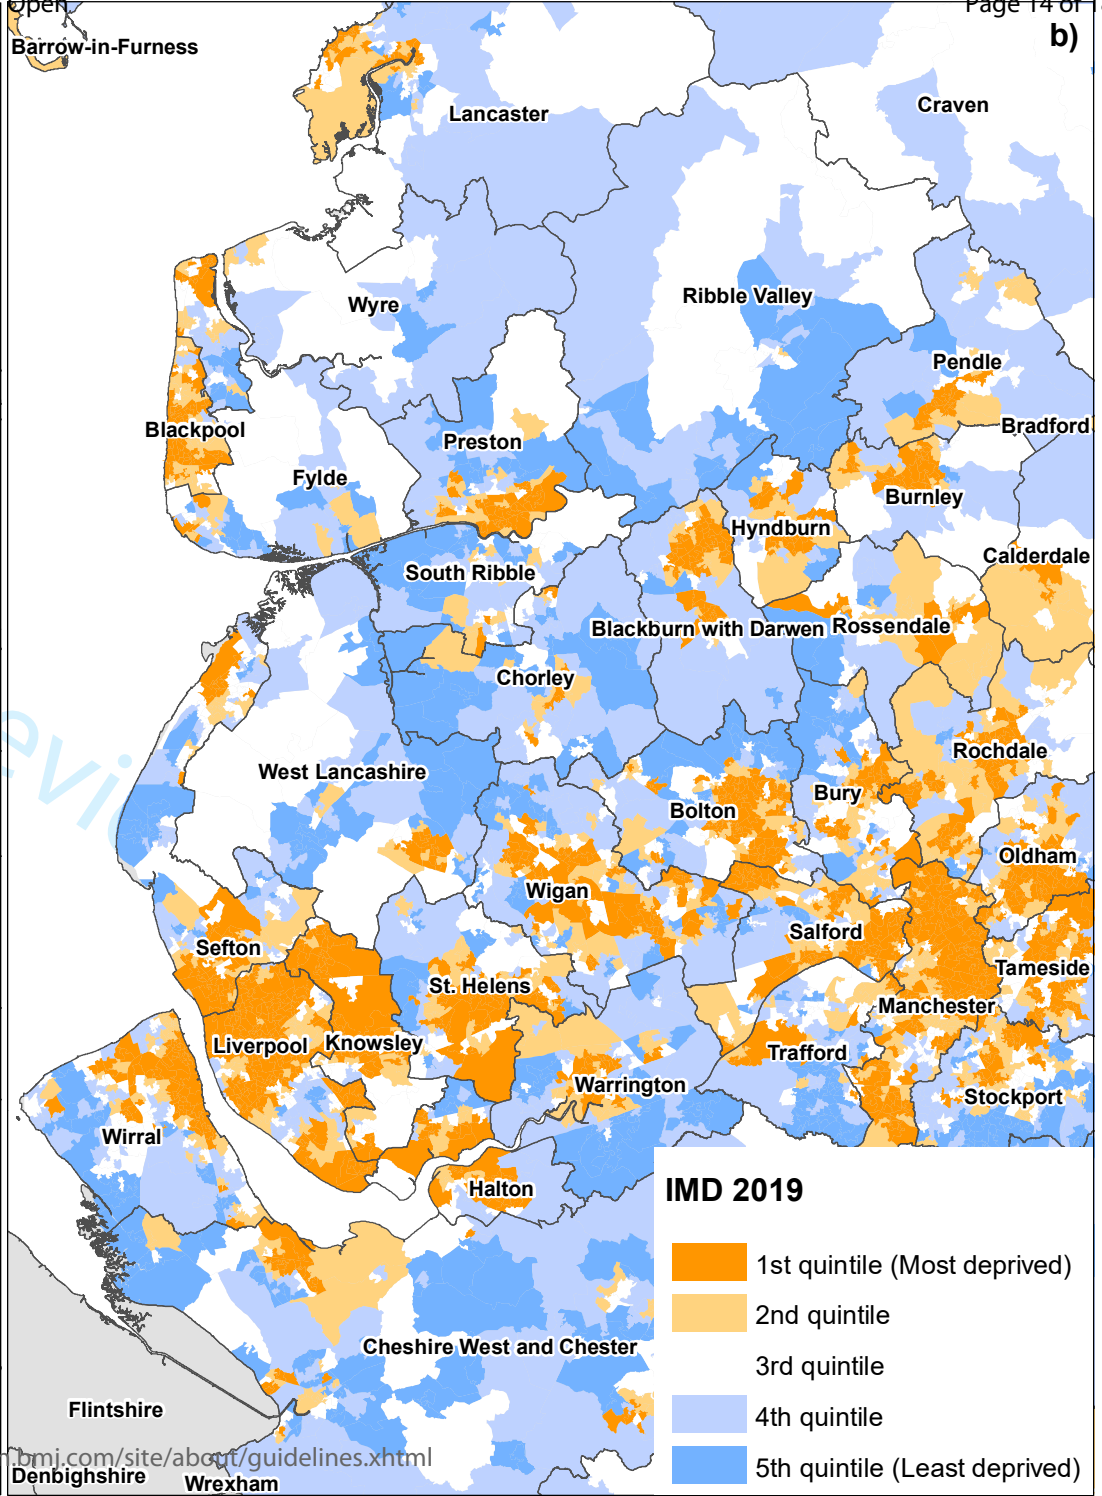

1  
2  
3  
4  
5  
6  
7  
8  
9  
10  
11  
12  
13  
14  
15  
16  
17  
18  
19  
20  
21  
22  
23  
24  
25  
26  
27  
28  
29  
30  
31  
32  
33  
34  
35  
36  
37  
38  
39  
40  
41  
42  
43  
44  
45  
46

26  
28

For peer review only - <http://bmjopen.bmj.com/site/about/guidelines.xhtml>

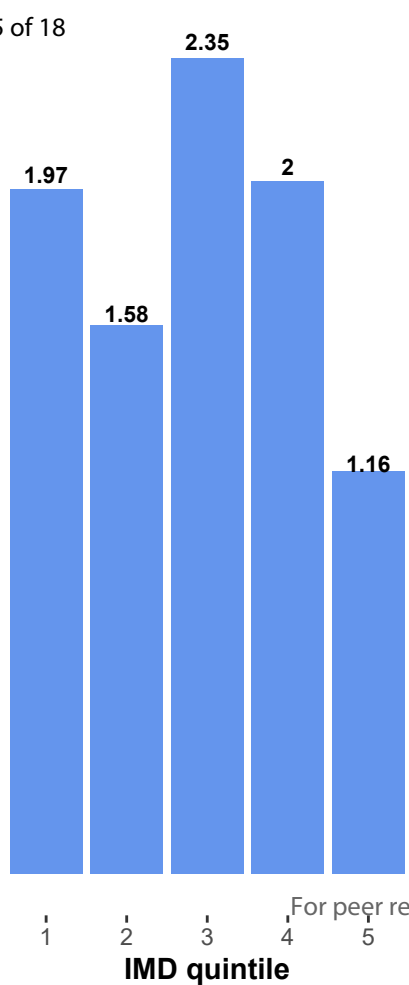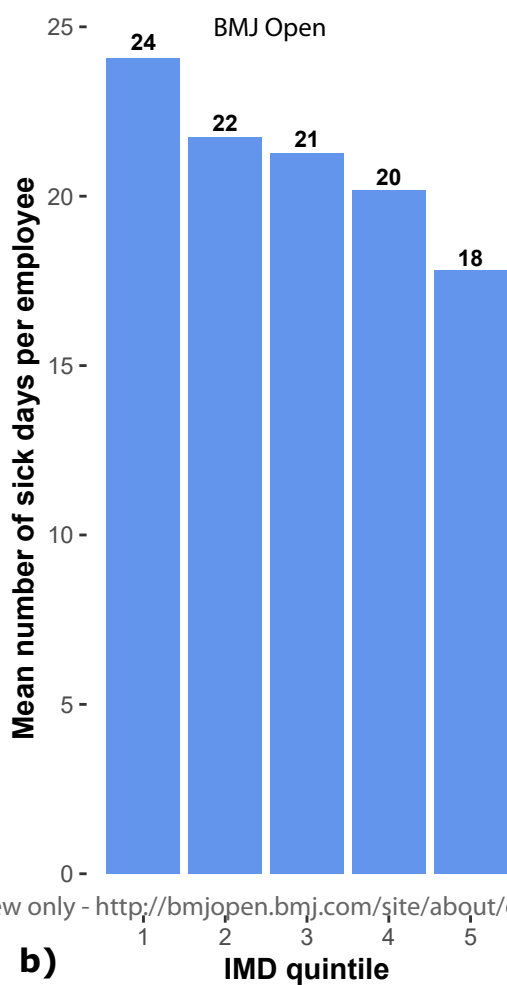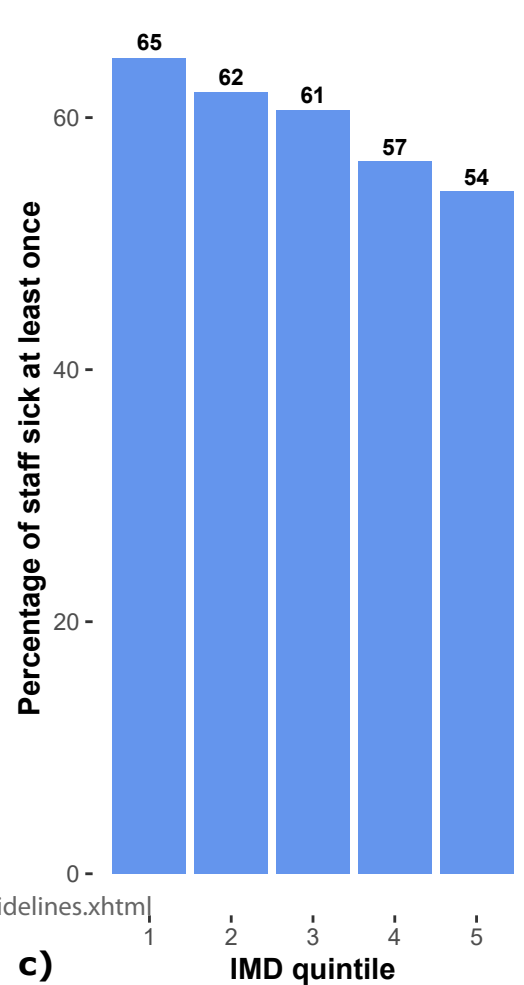



**Supplementary material****Table 1: Mean, Median and Standard Deviation of employees on sick leave (days) by area deprivation, age group, sex, wage band and occupational group.**

|                                                       | Employees: All      |                         |          |             | Employees:<br>On sick leave at least once |                         |           |             |
|-------------------------------------------------------|---------------------|-------------------------|----------|-------------|-------------------------------------------|-------------------------|-----------|-------------|
|                                                       | n (%)               | Sickness absence (days) |          |             | n (%)                                     | Sickness absence (days) |           |             |
|                                                       |                     | Mean                    | Median   | SD          |                                           | Mean                    | Median    | SD          |
| <b>Area deprivation</b>                               |                     |                         |          |             |                                           |                         |           |             |
| Quintile 1 (most deprived)                            | 2,478 (36%)         | 24.1                    | 4        | 47.8        | 1,603 (39%)                               | 37.2                    | 14        | 55.2        |
| Quintile 2                                            | 1,169 (17%)         | 21.7                    | 3        | 44.1        | 725 (17%)                                 | 35.1                    | 11        | 51.7        |
| Quintile 3                                            | 1,397 (20%)         | 21.3                    | 3        | 45.5        | 846 (20%)                                 | 35.1                    | 11        | 54.1        |
| Quintile 4                                            | 1,125 (16%)         | 20.2                    | 2        | 46.7        | 636 (15%)                                 | 35.7                    | 11        | 57.5        |
| Quintile 5 (least deprived )                          | 657 (11%)           | 17.8                    | 2        | 41.4        | 356 (9%)                                  | 32.9                    | 9         | 51.7        |
| <b>Age groups</b>                                     |                     |                         |          |             |                                           |                         |           |             |
| 71-80                                                 | 21 (1%)             | 17.1                    | 0        | 41.4        | 9 (<1%)                                   | 40.0                    | 26        | 57.0        |
| 61-70                                                 | 553 (8%)            | 23.9                    | 3        | 43.6        | 329 (8%)                                  | 40.2                    | 17        | 50.4        |
| 51-60                                                 | 2,198 (32%)         | 26.0                    | 4        | 52.7        | 1,369 (32%)                               | 41.7                    | 14        | 61.6        |
| 41-50                                                 | 1,676 (24%)         | 23.1                    | 3        | 48.1        | 1,019 (25%)                               | 38.0                    | 13        | 56.9        |
| 31-40                                                 | 1,465 (21%)         | 18.5                    | 3        | 39.3        | 891(21%)                                  | 30.4                    | 10        | 46.7        |
| 18-30                                                 | 913 (14%)           | 13.9                    | 2        | 33.0        | 549 (13%)                                 | 23.1                    | 7         | 40.1        |
| <b>Sex</b>                                            |                     |                         |          |             |                                           |                         |           |             |
| Female                                                | 4,974 (73%)         | 21.7                    | 3        | 45.1        | 3,076 (74%)                               | 35.1                    | 12        | 53.1        |
| Male                                                  | 1,852 (27%)         | 22.3                    | 3        | 48.2        | 1,090 (26%)                               | 37.8                    | 12        | 57.9        |
| <b>Wage Bands</b>                                     |                     |                         |          |             |                                           |                         |           |             |
| 1-2                                                   | 805 (12%)           | 23.7                    | 4        | 50.1        | 510 (12%)                                 | 37.4                    | 12        | 58.7        |
| 3                                                     | 1,755 (26%)         | 28.5                    | 6        | 51.7        | 1,238 (30%)                               | 40.4                    | 15        | 57.5        |
| 4                                                     | 691 (10%)           | 22.9                    | 3        | 50.4        | 437 (11%)                                 | 36.3                    | 11        | 59.4        |
| 5                                                     | 1,171 (17%)         | 21.8                    | 3        | 43.2        | 722 (17%)                                 | 35.4                    | 13        | 50.5        |
| 6                                                     | 1,247 (18%)         | 18.5                    | 3        | 40.9        | 761 (18%)                                 | 30.4                    | 9         | 48.8        |
| 7                                                     | 683 (10%)           | 15.0                    | 0        | 39.1        | 324 (8%)                                  | 31.6                    | 9         | 52.0        |
| 8-9                                                   | 474 (7%)            | 11.1                    | 0        | 31.9        | 174 (4%)                                  | 30.4                    | 8         | 46.9        |
| <b>Occupational groups</b>                            |                     |                         |          |             |                                           |                         |           |             |
| Scientific, Technical and Allied Health Professionals | 725 (11%)           | 11.4                    | 0        | 32.3        | 357 (8%)                                  | 23.1                    | 6         | 43.0        |
| Additional Clinical Services (Health Care Assistants) | 1,911 (28%)         | 30.4                    | 6        | 55.3        | 1,354 (33%)                               | 42.9                    | 16        | 61.4        |
| Estates and Ancillary                                 | 454 (6%)            | 22.1                    | 4        | 47.7        | 284 (7%)                                  | 35.3                    | 11        | 56.3        |
| Nursing and Midwifery Registered                      | 2,182 (32%)         | 21.9                    | 3        | 44.2        | 1,333 (32%)                               | 35.9                    | 13        | 52.0        |
| Administrative and Clerical group                     | 1,554 (23%)         | 16.1                    | 1        | 38.3        | 838 (20%)                                 | 29.8                    | 8         | 48.0        |
| <b>Total</b>                                          | <b>6,826 (100%)</b> | <b>21.9</b>             | <b>3</b> | <b>46.0</b> | <b>4,166 (100%)</b>                       | <b>35.8</b>             | <b>12</b> | <b>54.4</b> |

SD = Standard Deviation

**Assessment of multicollinearity.**

We also examined the multicollinearity between the variables in both models using Variance Inflation Factors (VIF). VIF results for both models were less than 2.0 when considering the number of coefficients (Df) in the variable, suggesting that multicollinearity was not a cause for concern (Table 2).

**Table 2: Results from VIF analysis for both models: Model 1 includes only demographic variables and Model 2 includes additional wage bands and Staff group variables.**

|             | Model 1 (without Wage Bands & Staff Groups) |    |                  | Model 2 (with Wage Bands & Staff Groups) |    |                  |
|-------------|---------------------------------------------|----|------------------|------------------------------------------|----|------------------|
|             | VIF                                         | Df | $VIF^{1/(2*Df)}$ | VIF                                      | Df | $VIF^{1/(2*Df)}$ |
| IMD         | 1.01                                        | 4  | 1.00             | 1.10                                     | 4  | 1.01             |
| Age group   | 1.02                                        | 5  | 1.00             | 1.14                                     | 5  | 1.01             |
| Gender      | 1.01                                        | 1  | 1.00             | 1.06                                     | 1  | 1.03             |
| Band        | -                                           | -  | -                | 7.13                                     | 6  | 1.18             |
| Staff group | -                                           | -  | -                | 6.83                                     | 4  | 1.27             |



## STROBE Statement—checklist of items that should be included in reports of observational studies

|                              | Item No | Recommendation                                                                                                                                                                                                                                                                                                                                                                                                                                                         | Page |
|------------------------------|---------|------------------------------------------------------------------------------------------------------------------------------------------------------------------------------------------------------------------------------------------------------------------------------------------------------------------------------------------------------------------------------------------------------------------------------------------------------------------------|------|
| <b>Title and abstract</b>    | 1       | (a) Indicate the study's design with a commonly used term in the title or the abstract                                                                                                                                                                                                                                                                                                                                                                                 | p1   |
|                              |         | (b) Provide in the abstract an informative and balanced summary of what was done and what was found                                                                                                                                                                                                                                                                                                                                                                    | p1   |
| <b>Introduction</b>          |         |                                                                                                                                                                                                                                                                                                                                                                                                                                                                        |      |
| Background/rationale         | 2       | Explain the scientific background and rationale for the investigation being reported                                                                                                                                                                                                                                                                                                                                                                                   | p2   |
| Objectives                   | 3       | State specific objectives, including any prespecified hypotheses                                                                                                                                                                                                                                                                                                                                                                                                       | p3-4 |
| <b>Methods</b>               |         |                                                                                                                                                                                                                                                                                                                                                                                                                                                                        |      |
| Study design                 | 4       | Present key elements of study design early in the paper                                                                                                                                                                                                                                                                                                                                                                                                                | p3-4 |
| Setting                      | 5       | Describe the setting, locations, and relevant dates, including periods of recruitment, exposure, follow-up, and data collection                                                                                                                                                                                                                                                                                                                                        | p3-4 |
| Participants                 | 6       | (a) <i>Cohort study</i> —Give the eligibility criteria, and the sources and methods of selection of participants. Describe methods of follow-up<br><i>Case-control study</i> —Give the eligibility criteria, and the sources and methods of case ascertainment and control selection. Give the rationale for the choice of cases and controls<br><i>Cross-sectional study</i> —Give the eligibility criteria, and the sources and methods of selection of participants | p3-4 |
|                              |         | (b) <i>Cohort study</i> —For matched studies, give matching criteria and number of exposed and unexposed<br><i>Case-control study</i> —For matched studies, give matching criteria and the number of controls per case                                                                                                                                                                                                                                                 |      |
| Variables                    | 7       | Clearly define all outcomes, exposures, predictors, potential confounders, and effect modifiers. Give diagnostic criteria, if applicable                                                                                                                                                                                                                                                                                                                               | p4   |
| Data sources/<br>measurement | 8*      | For each variable of interest, give sources of data and details of methods of assessment (measurement). Describe comparability of assessment methods if there is more than one group                                                                                                                                                                                                                                                                                   | p4   |
| Bias                         | 9       | Describe any efforts to address potential sources of bias                                                                                                                                                                                                                                                                                                                                                                                                              | p4   |
| Study size                   | 10      | Explain how the study size was arrived at                                                                                                                                                                                                                                                                                                                                                                                                                              | p3-4 |
| Quantitative<br>variables    | 11      | Explain how quantitative variables were handled in the analyses. If applicable, describe which groupings were chosen and why                                                                                                                                                                                                                                                                                                                                           | p4   |
| Statistical methods          | 12      | (a) Describe all statistical methods, including those used to control for confounding                                                                                                                                                                                                                                                                                                                                                                                  | p4-5 |
|                              |         | (b) Describe any methods used to examine subgroups and interactions                                                                                                                                                                                                                                                                                                                                                                                                    | p4-5 |
|                              |         | (c) Explain how missing data were addressed                                                                                                                                                                                                                                                                                                                                                                                                                            | N/A  |
|                              |         | (d) <i>Cohort study</i> —If applicable, explain how loss to follow-up was addressed<br><i>Case-control study</i> —If applicable, explain how matching of cases and controls was addressed<br><i>Cross-sectional study</i> —If applicable, describe analytical methods taking account of sampling strategy                                                                                                                                                              | N/A  |
|                              |         | (e) Describe any sensitivity analyses                                                                                                                                                                                                                                                                                                                                                                                                                                  | p5   |

1  
2  
3  
4  
5  
6  
7  
8  
9  
10  
11  
12  
13  
14  
15  
16  
17  
18  
19  
20  
21  
22  
23  
24  
25  
26  
27  
28  
29  
30  
31  
32  
33  
34  
35  
36  
37  
38  
39  
40  
41  
42  
43  
44  
45  
46  
47  
48  
49  
50  
51  
52  
53  
54  
55  
56  
57  
58  
59  
60

| <b>Results</b>           |     |                                                                                                                                                                                                              |      |
|--------------------------|-----|--------------------------------------------------------------------------------------------------------------------------------------------------------------------------------------------------------------|------|
| Participants             | 13* | (a) Report numbers of individuals at each stage of study—eg numbers potentially eligible, examined for eligibility, confirmed eligible, included in the study, completing follow-up, and analysed            | N/A  |
|                          |     | (b) Give reasons for non-participation at each stage                                                                                                                                                         | N/A  |
|                          |     | (c) Consider use of a flow diagram                                                                                                                                                                           | N/A  |
| Descriptive data         | 14* | (a) Give characteristics of study participants (eg demographic, clinical, social) and information on exposures and potential confounders                                                                     | N/A  |
|                          |     | (b) Indicate number of participants with missing data for each variable of interest                                                                                                                          | N/A  |
|                          |     | (c) <i>Cohort study</i> —Summarise follow-up time (eg, average and total amount)                                                                                                                             |      |
| Outcome data             | 15* | <i>Cohort study</i> —Report numbers of outcome events or summary measures over time                                                                                                                          |      |
|                          |     | <i>Case-control study</i> —Report numbers in each exposure category, or summary measures of exposure                                                                                                         |      |
|                          |     | <i>Cross-sectional study</i> —Report numbers of outcome events or summary measures                                                                                                                           | p5   |
| Main results             | 16  | (a) Give unadjusted estimates and, if applicable, confounder-adjusted estimates and their precision (eg, 95% confidence interval). Make clear which confounders were adjusted for and why they were included | p6-7 |
|                          |     | (b) Report category boundaries when continuous variables were categorized                                                                                                                                    | p5-7 |
|                          |     | (c) If relevant, consider translating estimates of relative risk into absolute risk for a meaningful time period                                                                                             | N/A  |
| Other analyses           | 17  | Report other analyses done—eg analyses of subgroups and interactions, and sensitivity analyses                                                                                                               | p7   |
| <b>Discussion</b>        |     |                                                                                                                                                                                                              |      |
| Key results              | 18  | Summarise key results with reference to study objectives                                                                                                                                                     | p7   |
| Limitations              | 19  | Discuss limitations of the study, taking into account sources of potential bias or imprecision. Discuss both direction and magnitude of any potential bias                                                   | p8   |
| Interpretation           | 20  | Give a cautious overall interpretation of results considering objectives, limitations, multiplicity of analyses, results from similar studies, and other relevant evidence                                   | p8   |
| Generalisability         | 21  | Discuss the generalisability (external validity) of the study results                                                                                                                                        | p8-9 |
| <b>Other information</b> |     |                                                                                                                                                                                                              |      |
| Funding                  | 22  | Give the source of funding and the role of the funders for the present study and, if applicable, for the original study on which the present article is based                                                | p9   |

\*Give information separately for cases and controls in case-control studies and, if applicable, for exposed and unexposed groups in cohort and cross-sectional studies.

**Note:** An Explanation and Elaboration article discusses each checklist item and gives methodological background and published examples of transparent reporting. The STROBE checklist is best used in conjunction with this article (freely available on the Web sites of PLoS Medicine at <http://www.plosmedicine.org/>, Annals of Internal Medicine at <http://www.annals.org/>, and Epidemiology at <http://www.epidem.com/>). Information on the STROBE Initiative is available at [www.strobe-statement.org](http://www.strobe-statement.org).
