# Supplementary material for: Socioeconomic differences in recruitment and sickness absence in a large NHS health organisation: a cross-sectional study
Source: PubMed Central journal article supplement — BMJ Open. 2022 Apr 29;12(4):e049880. doi: 10.1136/bmjopen-2021-049880 (PMC9058785; doi:10.1136/bmjopen-2021-049880), 2022-04-29
Supplement: bmjopen-2021-049880supp001.pdf [file bmjopen-2021-049880supp001.pdf]

**Supplementary material****Table 1: Mean, Median and Standard Deviation of employees on sick leave (days) by area deprivation, age group, sex, wage band and occupational group.**

|                                                       | Employees: All      |                         |          | Employees:<br>On sick leave at least once |                     |                         |           |             |
|-------------------------------------------------------|---------------------|-------------------------|----------|-------------------------------------------|---------------------|-------------------------|-----------|-------------|
|                                                       | n (%)               | Sickness absence (days) |          |                                           | n (%)               | Sickness absence (days) |           |             |
|                                                       |                     | Mean                    | Median   | SD                                        |                     | Mean                    | Median    | SD          |
| <b>Area deprivation</b>                               |                     |                         |          |                                           |                     |                         |           |             |
| Quintile 1 (most deprived)                            | 2,478 (36%)         | 24.1                    | 4        | 47.8                                      | 1,603 (39%)         | 37.2                    | 14        | 55.2        |
| Quintile 2                                            | 1,169 (17%)         | 21.7                    | 3        | 44.1                                      | 725 (17%)           | 35.1                    | 11        | 51.7        |
| Quintile 3                                            | 1,397 (20%)         | 21.3                    | 3        | 45.5                                      | 846 (20%)           | 35.1                    | 11        | 54.1        |
| Quintile 4                                            | 1,125 (16%)         | 20.2                    | 2        | 46.7                                      | 636 (15%)           | 35.7                    | 11        | 57.5        |
| Quintile 5 (least deprived )                          | 657 (11%)           | 17.8                    | 2        | 41.4                                      | 356 (9%)            | 32.9                    | 9         | 51.7        |
| <b>Age groups</b>                                     |                     |                         |          |                                           |                     |                         |           |             |
| 71-80                                                 | 21 (1%)             | 17.1                    | 0        | 41.4                                      | 9 (<1%)             | 40.0                    | 26        | 57.0        |
| 61-70                                                 | 553 (8%)            | 23.9                    | 3        | 43.6                                      | 329 (8%)            | 40.2                    | 17        | 50.4        |
| 51-60                                                 | 2,198 (32%)         | 26.0                    | 4        | 52.7                                      | 1,369 (32%)         | 41.7                    | 14        | 61.6        |
| 41-50                                                 | 1,676 (24%)         | 23.1                    | 3        | 48.1                                      | 1,019 (25%)         | 38.0                    | 13        | 56.9        |
| 31-40                                                 | 1,465 (21%)         | 18.5                    | 3        | 39.3                                      | 891(21%)            | 30.4                    | 10        | 46.7        |
| 18-30                                                 | 913 (14%)           | 13.9                    | 2        | 33.0                                      | 549 (13%)           | 23.1                    | 7         | 40.1        |
| <b>Sex</b>                                            |                     |                         |          |                                           |                     |                         |           |             |
| Female                                                | 4,974 (73%)         | 21.7                    | 3        | 45.1                                      | 3,076 (74%)         | 35.1                    | 12        | 53.1        |
| Male                                                  | 1,852 (27%)         | 22.3                    | 3        | 48.2                                      | 1,090 (26%)         | 37.8                    | 12        | 57.9        |
| <b>Wage Bands</b>                                     |                     |                         |          |                                           |                     |                         |           |             |
| 1-2                                                   | 805 (12%)           | 23.7                    | 4        | 50.1                                      | 510 (12%)           | 37.4                    | 12        | 58.7        |
| 3                                                     | 1,755 (26%)         | 28.5                    | 6        | 51.7                                      | 1,238 (30%)         | 40.4                    | 15        | 57.5        |
| 4                                                     | 691 (10%)           | 22.9                    | 3        | 50.4                                      | 437 (11%)           | 36.3                    | 11        | 59.4        |
| 5                                                     | 1,171 (17%)         | 21.8                    | 3        | 43.2                                      | 722 (17%)           | 35.4                    | 13        | 50.5        |
| 6                                                     | 1,247 (18%)         | 18.5                    | 3        | 40.9                                      | 761 (18%)           | 30.4                    | 9         | 48.8        |
| 7                                                     | 683 (10%)           | 15.0                    | 0        | 39.1                                      | 324 (8%)            | 31.6                    | 9         | 52.0        |
| 8-9                                                   | 474 (7%)            | 11.1                    | 0        | 31.9                                      | 174 (4%)            | 30.4                    | 8         | 46.9        |
| <b>Occupational groups</b>                            |                     |                         |          |                                           |                     |                         |           |             |
| Scientific, Technical and Allied Health Professionals | 725 (11%)           | 11.4                    | 0        | 32.3                                      | 357 (8%)            | 23.1                    | 6         | 43.0        |
| Additional Clinical Services (Health Care Assistants) | 1,911 (28%)         | 30.4                    | 6        | 55.3                                      | 1,354 (33%)         | 42.9                    | 16        | 61.4        |
| Estates and Ancillary                                 | 454 (6%)            | 22.1                    | 4        | 47.7                                      | 284 (7%)            | 35.3                    | 11        | 56.3        |
| Nursing and Midwifery Registered                      | 2,182 (32%)         | 21.9                    | 3        | 44.2                                      | 1,333 (32%)         | 35.9                    | 13        | 52.0        |
| Administrative and Clerical group                     | 1,554 (23%)         | 16.1                    | 1        | 38.3                                      | 838 (20%)           | 29.8                    | 8         | 48.0        |
| <b>Total</b>                                          | <b>6,826 (100%)</b> | <b>21.9</b>             | <b>3</b> | <b>46.0</b>                               | <b>4,166 (100%)</b> | <b>35.8</b>             | <b>12</b> | <b>54.4</b> |

SD = Standard Deviation

**Assessment of multicollinearity.**

We also examined the multicollinearity between the variables in both models using Variance Inflation Factors (VIF). VIF results for both models were less than 2.0 when considering the number of coefficients (Df) in the variable, suggesting that multicollinearity was not a cause for concern (Table 2).

**Table 2: Results from VIF analysis for both models: Model 1 includes only demographic variables and Model 2 includes additional wage bands and Staff group variables.**

|             | Model 1 (without Wage Bands & Staff Groups) |    |                  | Model 2 (with Wage Bands & Staff Groups) |    |                  |
|-------------|---------------------------------------------|----|------------------|------------------------------------------|----|------------------|
|             | VIF                                         | Df | $VIF^{1/(2*Df)}$ | VIF                                      | Df | $VIF^{1/(2*Df)}$ |
| IMD         | 1.01                                        | 4  | 1.00             | 1.10                                     | 4  | 1.01             |
| Age group   | 1.02                                        | 5  | 1.00             | 1.14                                     | 5  | 1.01             |
| Gender      | 1.01                                        | 1  | 1.00             | 1.06                                     | 1  | 1.03             |
| Band        | -                                           | -  | -                | 7.13                                     | 6  | 1.18             |
| Staff group | -                                           | -  | -                | 6.83                                     | 4  | 1.27             |
